# Supplementary material
Source: publisher figshare collection journal article supplement (https://gsapubs.figshare.com/ndownloader/files/23314271)
Supplement: Supplementary file 1 [file 23314271]

## Sheet: S1 Monazite U-Pb TE
Briggs, S.I., and Cottle, J.M., 2019, Accessory mineral petrochronology reveals 30 m.y. of partial melting during the separation of Zealandia from eastern Gondwana: Lithosphere, https://doi.org/10.1130/L1021.1.
GSA Data Repository Item 2019030
S1: Monazite U-Th/Pb data														Monazite trace element data (ppm)
Sample	Spot	U ppm	Th ppm	Th/U	207Pb/ 206Pb	2SE %	206Pb/ 238U	2SE %	208Pb/ 232Th	2SE %	208Pb/232Th Date (Ma)	2SE abs.		Y	La	Ce	Pr	Nd	Sm	Eu	Gd	Tb	Dy	Ho	Er	Tm	Yb	Lu
DC2	1	385	45800	118.961	0.062	0.017	0.01019	0.00077	0.002721	5.51336e-05	54.91	1.11511		4540	136400	312000	34100	129000	18000	625	9330	738	2020	195	260	21.5	68.1	6.69
DC2	2	549	47900	87.2495	0.088	0.016	0.01005	0.00054	0.002703	5.7162e-05	54.55	1.15589		4820	146000	314000	35000	132000	19900	673	10400	833	2300	225	305	24.2	78.8	7.72
DC2	4	2968	95500	32.1765	0.0601	0.0042	0.0101	0.0002	0.003024	6.57555e-05	61.03	1.32866		9380	134000	299000	34400	131000	26300	1050	15400	1370	3950	420	585	50.8	147	15.9
DC2	5	5150	86400	16.7767	0.0515	0.0033	0.00965	0.00016	0.002989	6.52914e-05	60.32	1.31925		14900	147000	318000	36400	143000	27200	946	16700	1650	5130	574	860	77.8	244	25.9
DC2	6	2128	89200	41.9173	0.061	0.006	0.00969	0.00024	0.002968	6.25684e-05	59.91	1.26482		9800	144000	319000	36900	139000	29100	832	16900	1500	4230	424	547	44.4	119	12.71
DC2	7	4960	72700	14.6573	0.0514	0.0035	0.01003	0.00016	0.002992	6.34913e-05	60.39	1.2833		20000	133600	299000	33800	131000	31400	725	21700	2340	7300	830	1150	105	315	30.7
DC2	9	1282	74900	58.4243	0.0514	0.0069	0.0091	0.00031	0.002753	5.78475e-05	55.56	1.16971		5640	147000	302000	34300	132000	25100	698	13600	1060	2730	256	325	27.1	80.8	9.5
DC2	10	1779	73100	41.0905	0.0562	0.0071	0.00972	0.00026	0.003003	6.42433e-05	60.61	1.29837		8250	154000	284000	33900	135000	26100	813	15500	1280	3680	377	512	38.9	120.1	12.04
DC2	11	2094	75800	36.1987	0.06	0.0059	0.00962	0.0002	0.002987	6.11106e-05	60.28	1.23541		9200	136600	311000	34800	124100	26000	687	16400	1410	4090	411	516	39.6	116	12.8
DC2	12	2531	95300	37.6531	0.0571	0.0052	0.00986	0.00022	0.003003	6.48553e-05	60.6	1.3105		8360	139000	288000	30800	115000	21500	721	13400	1270	3860	404	533	44.6	136	13.73
DC2	13	2194	100100	45.6244	0.054	0.0049	0.00986	0.00023	0.003031	6.52306e-05	61.16	1.31188		7710	138000	286000	33500	121000	21600	812	12490	1126	3350	348	466	37.3	109	11.92
DC2	14	2558	111900	43.7451	0.0554	0.005	0.00981	0.00024	0.003046	6.54322e-05	61.46	1.31592		8430	144000	274000	32900	123000	22200	806	13400	1200	3640	387	513	42.1	118	14.29
DC2	15	3021	83700	27.7061	0.0535	0.004	0.00986	0.00021	0.003036	6.40921e-05	61.27	1.28938		10580	146000	298000	32100	121400	22400	879	13800	1320	4210	478	664	58.8	191	22
DC2	16	2896	80200	27.6934	0.0571	0.0045	0.00998	0.00019	0.003027	6.3969e-05	61.09	1.29284		10730	148000	287000	33600	125300	23000	940	14400	1350	4310	490	671	60.4	203	22.1
DC2	17	756	70200	92.8571	0.056	0.011	0.00965	0.00048	0.002764	6.30228e-05	55.79	1.27359		4440	148000	295000	32700	117100	17500	720	9610	750	2050	210.5	282	23.8	76	8.07
DC2	18	739	68700	92.9635	0.072	0.013	0.00947	0.00039	0.002754	5.90587e-05	55.59	1.19414		4950	162000	313000	34000	127000	18700	781	10180	754	2200	229	297	24.5	81	9
DC2	19	581	60900	104.819	0.187	0.016	0.01287	0.00074	0.002783	5.88501e-05	56.16	1.18979		4510	162000	287000	33600	119300	17000	722	9160	709	1980	194	271	22.2	68	8
DC2	20	541	64300	118.854	0.074	0.018	0.01013	0.00067	0.002736	5.82097e-05	55.23	1.17113		4530	150000	277000	31900	114500	17200	585	9310	708	1980	197	279	21.7	69.6	8.3
DC2	21	2780	69600	25.036	0.0555	0.005	0.01087	0.00026	0.002982	6.51988e-05	60.17	1.31727		7500	144000	286000	34600	127000	25000	698	15100	1270	3400	306	404	29.7	88	8.86
DC2	22	8480	87000	10.2594	0.0493	0.0022	0.00951	0.00014	0.002888	5.97195e-05	58.29	1.20749		5580	147000	298000	33800	123000	29400	640	17500	1350	3020	206	219	13.9	40.4	4.14
DC2	23	1895	80400	42.4274	0.0509	0.0055	0.00871	0.00026	0.00272	5.79926e-05	54.91	1.1728		7160	157000	306000	35500	129000	22900	725	13500	1182	3510	333	433	35.1	107	11.2
DC2	24	1433	86600	60.4327	0.0587	0.0079	0.00926	0.00025	0.002858	6.04698e-05	57.67	1.22232		6700	145000	287000	34100	121000	21700	702	13300	1103	3260	313	423	33.5	104	11.8
DC2	26	740	70500	95.2703	0.07	0.012	0.00921	0.00035	0.002721	5.62469e-05	54.93	1.13776		5980	161000	315000	34600	132000	19600	788	10500	828	2580	247	352	29.1	84.6	9.5
DC2	27	897	67100	74.8049	0.0471	0.0086	0.01	0.00045	0.002746	5.77513e-05	55.43	1.16792		5560	163000	321000	35600	131000	18300	727	10600	829	2470	229	300	23.3	78.5	7.24
DC2	28	3201	80300	25.0859	0.0652	0.0041	0.0097	0.00017	0.002978	6.27056e-05	60.11	1.26167		13200	144000	296000	34000	127000	26100	792	16800	1570	5280	556	772	67.1	230	24.7
DC2	29	3540	68000	19.209	0.0549	0.0046	0.00941	0.00029	0.002794	5.84128e-05	56.4	1.18127		9000	159000	323000	35300	135000	25000	760	15600	1490	4470	403	490	35.3	112	10.7
DC2	30	680	60500	88.9706	0.077	0.012	0.00961	0.00046	0.00275	5.96202e-05	55.51	1.20541		4800	151000	318000	33600	126000	17800	726	9500	720	2060	200	265	20.6	65.2	7.07
DC2	31	2572	55000	21.3841	0.055	0.0039	0.00974	0.00023	0.002754	5.90587e-05	55.59	1.19414		6360	156000	321000	36000	133000	22200	855	12300	993	2870	264	342	25.4	83	8.7
DC2	32	2398	85000	35.4462	0.0619	0.0044	0.0096	0.0002	0.002954	6.06453e-05	59.62	1.22612		9570	135000	305000	31900	120500	22500	884	13600	1260	3860	411	565	44.7	150	16
DC2	33	1302	59380	45.6068	0.0699	0.0088	0.00983	0.00031	0.002885	6.39251e-05	58.23	1.29183		6940	147000	334000	34100	129000	19720	868	11360	932	2930	287	395	32.9	100.7	9.82
DC2	34	745	64500	86.5772	0.076	0.012	0.00895	0.00035	0.002732	6.00087e-05	55.14	1.21309		4960	134000	295000	32500	123100	22700	688	12040	949	2380	215	262	18.3	58.5	6.12
DC2	35	2730	67900	24.8718	0.0597	0.005	0.0101	0.00025	0.002956	6.48557e-05	59.65	1.31042		11700	122000	285000	31400	130000	28900	654	18100	1720	5100	514	672	48.5	135	14.7
DC2	36	1245	62000	49.7992	0.0776	0.009	0.00991	0.00032	0.002896	6.7378e-05	58.45	1.36782		7420	140900	331000	32700	126000	23500	672	13300	1130	3210	323	421	32.9	98.3	9.6
DC2	37	704	58300	82.8125	0.057	0.013	0.00932	0.00044	0.002696	5.82801e-05	54.41	1.17216		5550	139000	299000	32500	123000	19100	651	10100	805	2240	229	320	25	74.3	7.62
DC2	38	590	62000	105.085	0.063	0.015	0.0097	0.0005	0.002702	6.292e-05	54.55	1.27157		4890	133000	291000	30400	114300	17400	617	9090	710	1980	198	267	21.7	67.9	7.4
DC2	39	580	60500	104.31	0.062	0.014	0.00977	0.00054	0.00275	6.08815e-05	55.5	1.23057		4600	142000	292000	30700	118000	17200	617	8680	642	1880	186	272	20.9	63.1	6.82
DC2	40	2616	65600	25.0765	0.0457	0.005	0.00932	0.00019	0.002763	6.04175e-05	55.77	1.22138		8180	131000	301000	30300	113000	19900	623	11360	1038	3150	338	478	36.9	112	12
DC2	41	573	66800	116.579	0.064	0.017	0.0098	0.00063	0.002718	6.04648e-05	54.85	1.22211		4350	132300	295000	30700	118000	17300	614	8430	654	1787	186.9	264	21.1	64.4	7.12
DC2	42	807	78200	96.9021	0.17	0.016	0.0111	0.00047	0.002749	6.28329e-05	55.49	1.26979		5090	144000	286000	28900	107600	15790	648	7940	637	1760	184	261	21.1	68.3	8.45
DC2	43	3390	64270	18.9587	0.05	0.0033	0.00964	0.00021	0.002947	6.6022e-05	59.48	1.33392		10000	128000	288000	30400	119900	24000	694	13910	1339	3900	427	573	45.3	140	15.7
DC2	44	1326	56100	42.3077	0.0561	0.007	0.01023	0.00028	0.002866	6.70062e-05	57.85	1.34669		6340	128000	291000	30000	115200	20400	673	10400	919	2590	258	348	26.6	88.9	9.09
DC2	45	1698	63500	37.3969	0.0561	0.0065	0.00961	0.00028	0.002878	6.44806e-05	58.09	1.30296		8100	121800	270000	31100	120000	24300	670	14400	1240	3480	333	426	31.7	95	9.7
DC2	46	905	59500	65.7459	0.0633	0.0094	0.01015	0.00047	0.002757	5.90991e-05	55.66	1.19509		6100	135000	303000	31100	116000	19200	650	9600	850	2230	223	286	22.1	73	6.95
DC2	47	582	75300	129.381	0.082	0.016	0.01002	0.0006	0.002775	6.51957e-05	56.02	1.31721		4880	160000	318000	33200	129000	19410	695	9700	707	1920	194	267	19.9	63.3	6.93
DC2	48	631	67400	106.815	0.06	0.015	0.00978	0.00066	0.002711	6.80001e-05	54.7	1.36555		5400	143000	309000	32500	113000	16900	607	8360	649	1820	199	289	23.8	79	9
DC2	49	624	56600	90.7051	0.058	0.013	0.00967	0.00049	0.002733	6.46809e-05	55.16	1.29974		4670	146000	337000	32600	114400	17200	673	8440	637	1730	178	266	19.7	64.6	7.13
MR13-3	1	7350	67400	9.17007	0.0656	0.00584905	0.0094	0.00021	0.00272	2.8e-05	54.9	0.57		4380	131000	278000	30800	110200	17640	692	8700	726	1800	177	233	16.2	50.6	5.83
MR13-3	2	18940	70200	3.70644	0.0619	0.00476368	0.00931	0.00018	0.002707	2.4e-05	54.65	0.47		5020	130300	253000	29600	110100	17700	723	8980	715	2130	211	283.4	21.1	65.1	7.1
MR13-3	3	46200	86300	1.86797	0.0537	0.00244816	0.00881	0.00012	0.002697	2.6e-05	54.44	0.52		8350	118500	250000	29020	105500	19300	508	10900	1031	3290	355	488	44.4	162	18.7
MR13-3	4	20200	83400	4.12871	0.0524	0.00243686	0.00881	0.00011	0.002698	2.7e-05	54.47	0.55		8410	117600	244000	27500	102700	18100	494	10930	1018	3170	338	503	42.8	160	16.3
MR13-3	5	9300	57700	6.2043	0.0531	0.00262447	0.00877	0.00011	0.002723	2.6e-05	54.96	0.52		9270	125000	267000	31000	116500	21540	529	11630	1106	3500	395	557	46.9	173	18.2
MR13-3	6	1994	104700	52.5075	0.1261	0.00697212	0.01075	0.00021	0.002745	2.4e-05	55.47	0.48		4210	122000	240000	28000	100700	16300	624	8320	652	1690	171	210	15	44.7	4.53
MR13-3	7	1548	109000	70.4134	0.062	0.0047642	0.00941	0.00019	0.002697	2.7e-05	54.44	0.55		4330	123000	249000	28500	102000	15900	639	8510	661	1830	171	217	14.9	51.2	5.18
MR13-3	8	1899	104500	55.029	0.0589	0.00378783	0.00945	0.00015	0.00272	2.4e-05	54.91	0.49		6250	117100	224000	28500	105000	19300	552	11000	950	2650	267	338	25	83.8	8.57
MR13-3	9	1141	115700	101.402	0.0607	0.00342254	0.00942	0.00016	0.002712	2.5e-05	54.74	0.51		5660	116500	225000	25300	95800	17100	548	10130	825	2260	239	305	22.4	66.6	7.9
MR13-3	10	1001	75700	75.6244	0.0711	0.00452903	0.00944	0.00016	0.002752	2.6e-05	55.55	0.52		7300	120000	247000	28600	102100	17400	673	10200	880	2610	299	404	31.2	112	11.9
MR13-3	11	1470	102000	69.3878	0.064	0.00335386	0.00973	0.00014	0.002809	3.5e-05	56.69	0.7		4840	121000	236000	26400	92900	16100	682	9120	746	2180	232	286	23.4	71.8	7.53
MR13-3	12	1512	98600	65.2116	0.0652	0.00345549	0.00967	0.00016	0.002841	2.6e-05	57.35	0.51		5330	117000	239000	26300	94700	16100	740	8670	705	1960	213	273	20.2	69.4	7.19
MR13-3	13	1554	101400	65.251	0.0641	0.00326244	0.00966	0.00016	0.002813	3e-05	56.78	0.6		4980	122000	237000	26300	95100	15300	685	8690	730	2040	216	267	21.5	72.1	7.17
MR13-3	14	1790	112500	62.8492	0.0581	0.00275685	0.00952	0.00014	0.002826	2.7e-05	57.04	0.54		5450	109000	236000	25500	94600	16820	751	10020	819	2350	250	300	22.8	77.4	8.22
MR13-3	15	1663	95200	57.2459	0.0568	0.00265528	0.00954	0.00014	0.002827	2.6e-05	57.07	0.52		6280	115500	233000	27600	99300	16800	806	9920	852	2460	267	336	26.5	84	9.2
MR13-3	16	1624	70500	43.4113	0.0525	0.00355844	0.00902	0.00012	0.002762	2.7e-05	55.74	0.54		7850	109000	236000	28400	105400	20000	514	12200	1080	3210	340	396	30.5	90	8.8
MR13-3	17	1634	72300	44.2472	0.0525	0.0029904	0.00897	0.00015	0.002741	2.6e-05	55.33	0.51		7880	114000	237000	28600	112400	21970	567	12690	1095	3200	330	408	28.9	94	8.79
MR13-3	18	2276	91700	40.29	0.0543	0.00272569	0.00915	0.00014	0.002733	3.1e-05	55.16	0.62		6480	115000	238000	28000	99000	18000	566	10500	887	2630	296	370	27.1	84.1	9.88
MR13-3	19	2425	92200	38.0206	0.0562	0.00255996	0.00913	0.00014	0.002759	2.6e-05	55.68	0.52		6320	125000	245000	26200	94500	16600	513	9910	840	2620	290	375	30.3	95	11.5
MR13-3	20	2280	106600	46.7544	0.0515	0.00261169	0.00927	0.00012	0.002774	2.4e-05	55.99	0.49		6550	119000	245000	27000	104000	17900	579	11000	887	2750	297	369	28	81.1	9.2
MR13-3	21	2731	100500	36.7997	0.0588	0.0022345	0.00951	0.00011	0.002859	2.8e-05	57.71	0.56		6300	114800	240000	26300	93200	17300	635	9940	845	2540	265	381	27	88	9.52
MR13-3	22	2327	101500	43.6184	0.0632	0.00307208	0.00962	0.00014	0.002842	3e-05	57.35	0.6		6690	122000	242000	25600	97000	18340	503	11490	942	2970	305	394	32.6	104	11.2
MR13-3	23	1940	102200	52.6804	0.0656	0.00345852	0.00968	0.00013	0.00283	2.6e-05	57.12	0.53		5840	121000	234000	24700	94000	16200	572	9800	821	2430	255	341	25.4	83	10
MR13-3	24	2426	108400	44.6826	0.0645	0.00326559	0.00958	0.00012	0.002835	2.8e-05	57.22	0.57		5930	120000	228000	24600	94900	17700	551	10040	824	2510	264	349	28.2	85	9.48
MR13-3	25	2318	129700	55.9534	0.0595	0.00285939	0.00976	0.00014	0.002847	2.9e-05	57.47	0.59		6180	114100	231800	25400	104000	18200	620	10500	940	2790	275	373	28.7	92.4	9.84
MR13-3	26	3521	89200	25.3337	0.0555	0.00211473	0.00933	0.00012	0.00285	3e-05	57.52	0.61		11300	111900	241000	28200	109000	23100	611	14400	1380	4410	456	669	55.7	179	21.1
MR13-3	27	1125	96200	85.5111	0.0576	0.00513099	0.00934	0.00022	0.002742	3.2e-05	55.35	0.65		4440	126000	256000	26300	102000	15800	551	8590	682	2060	197	246	19.1	55.9	6.4
MR13-3	28	1269	101100	79.669	0.0595	0.00436533	0.00957	0.00019	0.002743	2.7e-05	55.36	0.55		5090	122000	245000	26700	102000	17770	539	9320	757	2220	225	293	22.7	63.5	7.59
MR13-3	29	2004	114700	57.2355	0.0588	0.00303694	0.00918	0.00013	0.002744	3e-05	55.38	0.61		6040	118000	219000	24900	98000	17000	590	9800	861	2650	277	375	30	93.3	11.9
MR13-3	30	1758	117400	66.7804	0.0597	0.00407868	0.00927	0.00015	0.002731	3.2e-05	55.12	0.64		5940	117000	233800	25600	100800	16600	587	9430	824	2430	244	339	26.9	92	10.67
MR13-3	31	1239	113000	91.2026	0.0604	0.0040828	0.00959	0.00018	0.002738	2.9e-05	55.27	0.59		5050	121000	240000	26100	103000	16400	576	8890	716	2050	214	288	22.9	67	8
MR13-3	32	1462	64100	43.844	0.0917	0.00713958	0.00826	0.00014	0.002581	3e-05	52.1	0.61		6020	121500	249000	27500	99200	17600	559	9240	846	2500	280	368	32.5	115	13
MR13-3	33	721	77700	107.767	0.0524	0.00462042	0.00954	0.0002	0.002753	3.3e-05	55.56	0.66		4800	116000	227000	27100	103800	16300	591	8560	751	2120	208	286	20	60.1	6.86
MR13-3	34	788	81200	103.046	0.0631	0.00400408	0.00949	0.00018	0.002766	3.1e-05	55.83	0.63		5530	122000	235000	26800	103100	17200	616	9410	788	2290	224	304	23	70.2	8.35
MR13-3	35	721	102400	142.025	0.0594	0.00388604	0.00962	0.0002	0.002728	3.3e-05	55.06	0.67		4810	115000	226000	25500	100600	15800	610	8900	752	2160	207	277	21.1	64.6	7.6
MR13-3	36	727	102900	141.541	0.0623	0.00418957	0.00983	0.00018	0.002727	3.1e-05	55.05	0.62		4870	119000	227000	26100	95300	16300	598	8980	741	2130	216	282	20.4	64.3	7.34
MR13-3	37	411	38150	92.8224	0.0586	0.00513552	0.00925	0.00021	0.002795	3.2e-05	56.41	0.64		4500	131000	246900	27800	101900	15900	613	9040	692	1950	183	237	17.5	53.3	5.93
MR13-3	38	453	47110	103.996	0.0628	0.00496161	0.0092	0.00018	0.002678	2.7e-05	54.05	0.55		4440	110000	235000	24900	98000	15400	553	8250	687	1960	190	253	18.7	57.8	6.78
MR13-3	39	440	61000	138.636	0.0552	0.00521812	0.00948	0.00021	0.002717	3.4e-05	54.85	0.69		4560	109000	221000	24900	93000	15500	569	8120	678	1880	197	244	19	63.2	7.35
MR13-3	40	375.9	78200	208.034	0.0678	0.00811411	0.00953	0.0003	0.002698	4e-05	54.46	0.81		3520	113000	234000	25100	97000	14100	523	7560	571	1570	151	187	15.5	36.2	4.87
MR13-3	41	354.9	75600	213.018	0.0665	0.00565852	0.0098	0.00028	0.002711	3e-05	54.71	0.61		3720	115000	241000	25800	97000	14800	543	7340	543	1480	151	184	13.5	39.4	4.89
MR13-5	1	3552	50830	14.3102	0.0506	0.0013	0.01149	0.000235169	0.003619	4.2e-05	73.02	0.84		22800	136500	302000	33300	130800	30000	1078	20370	2210	7790	915	1368	121.3	356	37.7
MR13-5	2	4580	67100	14.6507	0.0524	0.0013	0.0114	0.000248276	0.003597	4.9e-05	72.57	0.98		25000	134700	297000	33600	124000	26840	1060	19110	2230	8380	1075	1780	147.1	459	53.3
MR13-5	3	4501	66800	14.8411	0.0525	0.0011	0.01134	0.000220304	0.003569	4.2e-05	72	0.84		25700	136500	289000	33400	126900	28900	1074	19400	2220	8250	1021	1610	146	467	50
MR13-5	4	4434	66800	15.0654	0.0518	0.0011	0.0113	0.000233089	0.003615	4.2e-05	72.93	0.85		26000	138000	286000	33400	133000	28700	1094	19390	2250	7970	1013	1670	144	452	51.8
MR13-5	5	3676	79400	21.5996	0.0554	0.0016	0.01149	0.000242084	0.003578	4.9e-05	72.19	0.99		20800	146000	306000	33900	130000	28100	1015	18100	1980	7130	851	1290	106.1	317	33.9
MR13-5	6	4386	66800	15.2303	0.0523	0.0012	0.01131	0.000226453	0.003574	4.5e-05	72.11	0.9		25900	137000	292000	33200	124100	27700	1049	19400	2230	8410	1078	1670	143	470	52.1
MR13-5	7	5307	78500	14.7918	0.0531	0.0011	0.01118	0.000212187	0.003562	3.9e-05	71.87	0.78		26200	147000	300000	34500	128300	29100	1083	19300	2160	8210	960	1550	133.3	425	46.4
MR13-5	8	10410	71500	6.8684	0.04877	0.0007	0.0114	0.000208904	0.003553	3.8e-05	71.7	0.76		25900	137900	306000	34500	123900	34900	674	24200	2790	8890	862	1185	92.3	270	26.7
MR13-5	9	7050	73750	10.461	0.04876	0.00093	0.01148	0.00022193	0.003539	3.8e-05	71.4	0.76		24700	152000	291000	32120	120400	31400	696	21590	2467	8680	924	1302	110	325	31.7
MR13-5	10	5785	70740	12.2282	0.0511	0.0012	0.01136	0.000227016	0.003558	4.3e-05	71.79	0.86		25700	152100	307000	32300	125400	32000	788	21700	2510	9090	991	1438	121.7	342	37
MR13-5	11	5249	65300	12.4405	0.0511	0.0012	0.01124	0.000219148	0.003529	4.3e-05	71.2	0.86		24500	137800	299000	34700	127100	32600	890	21700	2410	8300	923	1367	121.3	365	38.8
MR13-5	12	6520	58810	9.01994	0.04836	0.00097	0.01149	0.000222046	0.003499	4.1e-05	70.6	0.83		25200	150000	308000	36300	124700	34200	683	22600	2510	8160	866	1190	96	282	27.7
MR13-5	13	5960	57280	9.61074	0.04824	0.00097	0.01149	0.000222046	0.003535	4.4e-05	71.32	0.88		23000	138900	308000	35100	123300	33100	664	21500	2500	8130	905	1272	104.3	278	26.5
MR13-5	14	15730	70700	4.4946	0.04664	0.00058	0.01158	0.00023616	0.003573	4.7e-05	72.1	0.94		30500	125600	284000	34400	119000	38500	663	26600	3080	10110	949	1171	83.1	213	16.5
MR13-5	15	13660	67270	4.9246	0.04637	0.00064	0.01189	0.000220701	0.003598	3.9e-05	72.59	0.78		27300	126000	274000	32600	120100	35200	683	25400	2880	9480	873	1069	82.5	213	15.3
MR13-5	16	12120	73100	6.03135	0.04744	0.00078	0.01174	0.000231325	0.003528	4.3e-05	71.18	0.87		23180	123400	268000	31400	116800	38800	652	26700	2940	8700	726	890	57.5	166	12.4
MR13-5	17	11270	66400	5.89175	0.04667	0.0008	0.01171	0.000218524	0.003526	3.8e-05	71.14	0.76		25700	132000	287000	33300	118500	36300	702	24800	2740	8660	883	1100	81.7	211	17.6
MR13-5	18	12530	71200	5.68236	0.04696	0.00052	0.01164	0.000211861	0.003545	3.2e-05	71.53	0.64		25100	129000	285000	32800	118500	35100	638	24100	2820	8690	895	1200	91	248	20.8
MR13-5	19	15990	70400	4.40275	0.04706	0.00066	0.01161	0.000229844	0.003546	4.5e-05	71.55	0.9		27100	127000	258000	30800	110000	34800	678	25000	2970	9190	848	1072	79.4	212	16.8
MR13-5	20	10530	69500	6.60019	0.04707	0.00082	0.011849	0.000199223	0.00356	2.3e-05	71.83	0.46		26200	127000	253000	30900	115200	33000	674	22900	2740	8860	886	1187	86.5	262	23.8
MR13-5	21	7850	69700	8.87898	0.0486	0.001	0.01168	0.00020173	0.003551	2.7e-05	71.64	0.55		24900	127000	255000	31800	110800	31900	642	21600	2570	8580	949	1320	106	336	30.4
MR13-5	22	9010	56900	6.31521	0.0495	0.00088	0.011451	0.000195326	0.00356	2.7e-05	71.83	0.54		23900	146000	298000	32500	111000	30400	626	21100	2400	8530	915	1277	106.9	311	30.6
MR13-5	23	8870	55800	6.29087	0.04924	0.00091	0.01156	0.000200169	0.003551	2.9e-05	71.64	0.59		22700	134000	276000	31000	107600	30400	585	19800	2350	7970	815	1244	107.2	291	29.3
MR13-5	24	6260	43800	6.99681	0.0494	0.0012	0.011336	0.000193333	0.00356	2.9e-05	71.83	0.58		24900	138000	274000	30600	119000	25800	1030	19400	2330	8300	958	1540	135	412	46.1
MR13-5	25	7160	49700	6.94134	0.0489	0.0012	0.011152	0.000191394	0.00359	3.1e-05	72.43	0.62		27200	134000	275000	32600	111600	27800	1040	19300	2240	8320	1050	1640	148	471	47
MR13-5	26	5890	45700	7.75891	0.0501	0.0013	0.0113	0.0001968	0.003603	3.3e-05	72.69	0.67		24500	133000	283000	34100	124800	27000	1060	19400	2340	8050	961	1500	133	383	44
MR13-5	27	9010	55900	6.20422	0.04993	0.00097	0.01113	0.000194608	0.003549	3e-05	71.6	0.61		30100	130000	265000	32800	119100	26800	1094	19800	2540	9140	1107	1880	160	544	58.6
MR13-5	28	11370	100700	8.85664	0.05012	0.00095	0.011174	0.000193655	0.003518	3e-05	70.98	0.59		26600	110200	245000	28100	106000	24300	950	19400	2290	8470	1092	1870	169	513	57.3
MR13-12	1	18030	45200	2.50693	0.0493	0.0013	0.002589	3.8e-05	0.0083	0.000159688	52.26	0.76		23400	89400	197000	24600	91000	31800	104	19500	2640	8850	940	1392	147	613	62.8
MR13-12	2	15460	124900	8.07891	0.0494	0.0016	0.002516	3.5e-05	0.00812	0.000178144	50.79	0.71		28400	86000	199000	25100	96000	36200	121	22300	3020	10650	1136	1804	197	838	92.5
MR13-12	3	19630	114400	5.82781	0.0494	0.0013	0.002535	3.6e-05	0.008165	0.000157484	51.18	0.73		26800	98400	223000	26500	99100	34200	105	20200	2710	9610	1046	1530	178	685	70.7
MR13-12	4	14660	77400	5.27967	0.0493	0.0015	0.002527	3.2e-05	0.00836	0.000166809	51	0.65		26000	92500	245000	29300	108700	35100	109	21100	2630	8700	882	1330	139	558	57.8
MR13-12	5	13390	91600	6.84093	0.0498	0.0015	0.002515	3.2e-05	0.00828	0.000159454	50.77	0.64		31900	85800	215000	27500	109800	38500	121	23900	3120	10740	1190	1880	220	946	105
MR13-12	6	21690	99200	4.57354	0.0491	0.0014	0.002458	3.5e-05	0.0079	0.000161686	49.62	0.71		29600	103900	261000	31000	111200	39100	122.2	24300	3100	10680	1161	1820	194	831	87.5
MR13-12	7	14940	75100	5.02677	0.0497	0.002	0.002547	3.2e-05	0.008268	0.000157448	51.41	0.65		31700	95300	233000	29500	111000	38800	126	25000	3220	11290	1233	1890	223	929	106
MR13-12	8	15280	63800	4.17539	0.0478	0.0016	0.002541	3e-05	0.008134	0.000154021	51.3	0.61		32300	97000	229000	30600	113000	38100	122	23400	3000	10200	1090	1700	202	854	94.4
MR13-12	9	17250	99620	5.77507	0.0477	0.0012	0.002514	3.1e-05	0.00811	0.000164008	50.75	0.63		32400	87200	222000	27000	107000	39000	122	23100	3090	11200	1190	1890	209	889	102
MR13-12	10	20740	72100	3.47637	0.0476	0.0012	0.002502	2.6e-05	0.008102	0.000146607	50.5	0.52		36700	97000	235000	30100	108000	38900	126	24900	3240	11530	1210	1980	229	975	101.1
MR13-12	11	18120	63300	3.49338	0.0476	0.0015	0.002492	2.7e-05	0.008039	0.000149872	50.3	0.55		37200	103800	253000	31600	121000	41600	135	25900	3360	11700	1220	2030	228	988	106.7
MR13-12	12	18320	91700	5.00546	0.0491	0.0014	0.002505	3.3e-05	0.008006	0.000147708	50.57	0.66		33000	110000	262000	33100	122000	42000	136	25200	3230	10890	1160	1850	211	863	92.3
MR13-12	13	19960	89300	4.47395	0.0471	0.0015	0.00247	2.9e-05	0.007975	0.000146749	49.86	0.58		28800	108000	263000	32700	119000	41200	140	25400	3170	10830	1061	1670	175	698	70
MR13-12	14	17410	85300	4.89948	0.0472	0.0015	0.002498	2.6e-05	0.00814	0.000151094	50.43	0.53		25500	83600	212000	27500	98000	34900	111	21800	2750	9200	930	1400	148	585	61.7
MR13-12	15	17850	90400	5.06443	0.0476	0.0015	0.002497	2.8e-05	0.008237	0.000154644	50.4	0.57		27200	89000	209000	27900	105000	36900	118	21900	2760	9400	920	1450	160	603	62.5
MR13-12	16	12430	45400	3.65245	0.0486	0.0016	0.00252	3.7e-05	0.00826	0.000165684	50.86	0.75		26000	74800	198000	23600	87100	30900	100.6	19800	2550	9060	949	1510	172	692	78.3
MR13-12	17	13120	70900	5.40396	0.0487	0.0018	0.002531	3.1e-05	0.00821	0.000158638	51.09	0.62		26800	82100	192000	24300	92200	31400	106	20000	2590	8720	945	1490	174	712	78.6
MR13-12	18	13140	85500	6.50685	0.049	0.0018	0.002499	3.1e-05	0.00816	0.000158056	50.44	0.62		24100	72200	174000	23000	86900	32000	102.7	20000	2620	9070	918	1379	159	618	66.1
MR13-12	19	14140	61200	4.32815	0.047	0.0017	0.002498	3.1e-05	0.00818	0.000164789	50.42	0.63		24200	79900	189000	24800	89000	30800	98	20000	2510	8490	858	1360	158	596	68.5
MR13-12	20	13980	78100	5.58655	0.0502	0.0017	0.002526	3.4e-05	0.00827	0.000165796	50.99	0.68		25300	78000	185000	23800	88000	32000	99	18900	2500	8520	866	1360	156	590	67.8
MR13-12	21	13290	79500	5.98194	0.049	0.0019	0.002515	3.3e-05	0.0082	0.000165012	50.77	0.67		27300	82000	190000	24300	93000	32100	99	20100	2590	9500	950	1560	176	757	80.4
MR13-12	22	16040	124900	7.78678	0.0499	0.0018	0.002414	2.6e-05	0.0084	0.000154263	48.73	0.53		21300	86000	192000	25600	100000	42100	202	26000	2820	8460	675	849	80.2	287	30.5
MR13-12	23	16270	114400	7.03135	0.0463	0.0016	0.002449	2.7e-05	0.008614	0.000162777	49.43	0.54		20600	88000	214000	26300	103000	40700	162	25100	2840	8700	741	970	85.7	331	33.1
MR13-12	24	26440	77400	2.92738	0.0475	0.0014	0.002481	3.1e-05	0.008032	0.00015405	50.08	0.63		25700	84600	205000	27200	111400	41000	164	25800	3180	10400	895	1160	110	387	36.5
MR13-12	25	22150	91600	4.13544	0.0471	0.0016	0.002462	2.6e-05	0.008161	0.000150181	49.7	0.52		21900	86000	217000	26400	106000	37300	145	23900	2900	9130	778	1000	104	343	32.9
MR13-12	26	21650	99200	4.58199	0.0448	0.0014	0.002452	2.7e-05	0.008145	0.000155379	49.5	0.54		22800	92000	219000	27200	104000	37400	143	23900	2760	8920	768	997	93	343	31.8
MR13-12	27	21500	75100	3.49302	0.0484	0.0016	0.002596	3.5e-05	0.008073	0.000152686	52.41	0.7		25800	98400	224000	28300	106100	35900	159	23600	2840	9360	891	1350	145.1	577	59.6
MR13-12	28	24560	63800	2.59772	0.0476	0.0014	0.00247	3.1e-05	0.007956	0.000151915	49.85	0.62		26600	88800	216000	28000	105400	34800	131	22500	2820	9600	976	1451	162	625	66.7
MR13-12	29	25820	99620	3.85825	0.0491	0.0016	0.002487	2.9e-05	0.008218	0.000150305	50.21	0.58		27000	89000	201000	26500	107000	34300	121	21600	2710	9320	910	1430	148	594	64.7
MR13-12	30	22670	72100	3.18041	0.0508	0.0015	0.002508	3e-05	0.00804	0.000153523	50.62	0.6		27400	92000	222000	25800	97000	32200	118	20300	2460	8890	878	1340	150	634	65.2
MR13-12	31	20890	63300	3.03016	0.0499	0.0018	0.002516	3.5e-05	0.00795	0.00015563	50.78	0.7		31600	89000	196000	26200	97500	35500	126	23300	3070	10990	1157	1790	216	971	96.6
MR13-12	32	19570	91700	4.68574	0.0489	0.0016	0.002443	2.8e-05	0.008284	0.000154018	49.32	0.57		23200	92000	196000	26800	107000	36000	152	21500	2450	8500	743	1130	117	463	43.9
MR13-12	33	20990	89300	4.25441	0.0486	0.0018	0.002478	2.7e-05	0.00817	0.000158172	50.02	0.55		26600	91000	214000	28300	108000	37100	154	23000	2840	9400	880	1270	145	567	55.6
MR13-12	34	18760	96000	5.11727	0.05	0.0017	0.002508	2.6e-05	0.00827	0.000159337	50.63	0.52		23000	90000	199000	27100	106000	36300	134	21300	2630	8400	771	1130	122	463	47
MR13-12	35	23080	85300	3.69584	0.0484	0.0014	0.002458	3.2e-05	0.00812	0.000153855	49.63	0.64		27000	89000	207000	27400	108000	38000	146	22900	2910	9500	965	1410	161	622	65.3
MR13-12	36	21330	90400	4.23816	0.0499	0.0014	0.002517	2.9e-05	0.00823	0.000165348	50.8	0.59		23100	96000	234000	26900	107000	34500	132	21000	2590	8220	790	1120	117	473	47.8
MR13-12	37	25430	45400	1.78529	0.0479	0.0014	0.002543	3.1e-05	0.00797	0.000153324	51.33	0.63		38200	95000	208000	27900	106000	35400	137	24200	3100	11000	1140	1800	214	870	95
MR13-12	38	30200	70900	2.34768	0.0466	0.0015	0.002536	3.2e-05	0.008039	0.000151673	51.18	0.65		32900	103000	209000	27800	106000	36000	126	23200	2840	9990	1021	1520	174	664	69.6
MR13-12	39	23650	85500	3.61522	0.0471	0.0014	0.002486	3.1e-05	0.00805	0.000156782	50.19	0.62		27100	88800	208000	27300	106000	35600	115	22500	2820	9600	970	1480	148	584	62.1
MR13-12	40	21410	61200	2.85848	0.0499	0.0016	0.002515	3.2e-05	0.00799	0.00015609	50.76	0.65		35300	95000	203000	27800	107000	37300	116	24000	3170	11300	1210	2040	232	1010	112
MR13-12	41	31800	78100	2.45597	0.0533	0.0016	0.00251	3.1e-05	0.008	0.000156205	50.68	0.62		38700	88800	207000	27000	103000	36600	121	23900	3170	11600	1270	2000	235	990	102
MR13-12	42	33500	79500	2.37313	0.0464	0.0013	0.002503	3e-05	0.007912	0.000153912	50.53	0.6		32900	100000	210000	27900	109000	36600	121	23300	3020	10050	1050	1610	171	678	70.2
MR13-14	1	3570	65800	18.4314	0.0508	0.0042	0.01027	0.000258018	0.002977	3.7e-05	60.09	0.74		18100	83300	175100	21000	78600	19800	589	14500	1620	6160	761	1140	100	304	32.4
MR13-14	2	3642	71000	19.4948	0.0508	0.0038	0.01015	0.000249558	0.002967	4e-05	59.88	0.8		19600	92100	196000	23000	86800	20200	636	15370	1800	6620	780	1258	109.9	332	34.4
MR13-14	3	3427	51500	15.0277	0.0539	0.0039	0.00984	0.000274721	0.002969	4.2e-05	59.93	0.84		25200	92000	190000	24900	91600	21700	685	16400	1970	7670	962	1560	147	451	53.3
MR13-14	4	3201	63700	19.9	0.0525	0.0037	0.0102	0.000278943	0.002962	3.8e-05	59.78	0.76		20800	92000	192000	23900	93000	22000	723	16600	1910	7240	851	1300	110.3	352	35.7
MR13-14	5	2789	65500	23.4851	0.0527	0.0037	0.01054	0.00029815	0.002962	3.4e-05	59.79	0.69		20400	101000	214000	25400	93700	22600	794	16300	1840	6740	789	1193	100.9	306	33.4
MR13-14	6	9850	48900	4.96447	0.0508	0.0019	0.00954	0.000221558	0.00287	3.6e-05	57.92	0.72		17300	87700	184000	21810	84300	26100	523	15500	1900	6470	648	1060	121	459	53.1
MR13-14	7	8460	58700	6.93853	0.05	0.002	0.0097	0.000223797	0.00289	3.5e-05	58.32	0.7		18300	80900	166000	22700	79800	25500	503	16100	1930	6600	694	1120	126	453	50.7
MR13-14	8	9340	45400	4.86081	0.0489	0.0022	0.00953	0.000203779	0.002949	3.7e-05	59.52	0.75		18900	88000	184800	23900	87000	26700	552	17400	1940	6800	674	1080	117.2	426	48
MR13-14	9	10570	36540	3.45695	0.0474	0.002	0.00955	0.000215522	0.00292	3.6e-05	58.93	0.72		17100	83500	182000	22980	86800	25110	630	15810	1740	6330	642	1065	120.4	461	52.4
MR13-14	10	8870	36400	4.10372	0.0474	0.0019	0.00951	0.000227602	0.002899	3.9e-05	58.5	0.78		16100	92100	194000	24300	91000	26500	650	16730	1850	6190	626	981	112.2	403	45.9
MR13-14	11	9810	37540	3.82671	0.0477	0.0018	0.00956	0.000221837	0.002918	3.3e-05	58.88	0.67		18200	94400	193000	25100	90700	26200	675	17100	1950	6720	673	1119	124.2	440	50.1
MR13-14	12	6250	56700	9.072	0.0498	0.0023	0.00969	0.000223657	0.002881	3e-05	58.16	0.6		21500	115000	232000	28700	112900	28700	673	18400	1981	7210	788	1320	130	428	47.4
MR13-14	13	6260	57300	9.15335	0.0499	0.0029	0.0097	0.000230185	0.002904	3.1e-05	58.61	0.62		21800	105600	229000	28200	108400	27300	646	18400	2040	7420	804	1300	132	442	48.1
MR13-14	14	7450	61100	8.20134	0.0491	0.0024	0.00966	0.000223236	0.002909	3.3e-05	58.7	0.66		25200	112000	226000	28700	111200	28700	698	18800	2200	7940	865	1440	150	503	55.9
MR13-14	15	7510	61000	8.1225	0.0504	0.0025	0.00973	0.000224219	0.002903	3.6e-05	58.59	0.73		24100	101300	231000	29300	110000	27700	666	19000	2100	7970	876	1368	140	489	54.3
MR13-14	16	4370	68700	15.7208	0.0528	0.0041	0.00974	0.000258529	0.002927	4.6e-05	59.45	0.89		22100	114500	227000	27900	105000	23200	697	15590	1860	6880	846	1180	104.5	334	34.9
MR13-14	17	4740	71700	15.1266	0.0517	0.0031	0.00966	0.000265017	0.002945	3.7e-05	59.08	0.94		23600	107900	229000	28500	110400	25100	709	17500	1990	7290	882	1340	121	372	37.7
MR13-14	18	5390	78100	14.4898	0.0515	0.0038	0.00976	0.000266202	0.002941	3.6e-05	59.44	0.74		31900	95000	208000	26100	105500	24800	860	19100	2210	8420	1163	1840	171	566	58.7
MR13-14	19	5480	78600	14.3431	0.0522	0.0035	0.00973	0.000237221	0.002931	4e-05	59.35	0.73		34000	107000	249000	28400	112000	25900	920	20100	2330	9200	1190	1810	167	562	57.1
MR13-14	20	5170	78600	15.2031	0.0513	0.0037	0.00985	0.000267274	0.002902	3.5e-05	59.16	0.8		30700	109900	217000	26100	104900	24600	868	19800	2240	8880	1130	1810	164	555	55.5
MR13-14	21	6030	87200	14.461	0.0526	0.0041	0.00972	0.000258285	0.002919	3.4e-05	58.57	0.71		25700	115900	242000	27500	110700	25200	596	16400	1820	6760	830	1340	134	475	52.1
MR13-14	22	5770	87100	15.0953	0.0519	0.0035	0.00986	0.000267393	0.002928	4.7e-05	58.92	0.69		24300	111000	245000	29300	113000	25800	622	17000	1890	6730	831	1300	128.6	462	50.1
MR13-14	23	5820	87100	14.9656	0.0498	0.0039	0.00987	0.000252909	0.002929	4.2e-05	59.09	0.95		23400	115000	252000	27800	110000	25400	625	17000	1940	6950	826	1320	132	445	49.3
MR13-14	24	5390	81400	15.102	0.0521	0.0034	0.00997	0.000254177	0.002899	4.1e-05	59.12	0.84		22200	113000	228000	27000	109000	24900	596	16000	1740	6670	807	1230	127	438	47.5
MR13-14	25	5700	86700	15.2105	0.0502	0.0036	0.00991	0.000275535	0.002889	4.1e-05	58.52	0.84		25300	111900	250000	28000	113000	27300	668	18200	1910	6870	823	1305	139	478	49.7
MR13-14	26	5410	59400	10.9797	0.0533	0.0036	0.00966	0.000250268	0.002922	5.4e-05	58.3	0.84		20900	74400	154000	18600	76000	18400	456	13270	1480	5830	763	1213	143	507	53.1
MR13-14	27	5410	59300	10.9612	0.0489	0.0033	0.0097	0.000280865	0.002899	4.6e-05	59	1.1		21200	75400	161000	18700	71000	18700	461	12340	1540	5830	721	1250	138	491	52.1
MR13-14	28	5610	61500	10.9626	0.0513	0.0038	0.00972	0.000265727	0.00291	4.2e-05	58.51	0.93		22300	80300	159000	19900	76700	20000	482	14450	1605	6170	735	1247	125.9	494	54
MR13-14	29	5420	60800	11.2177	0.0491	0.0046	0.00989	0.000283004	0.002877	4.1e-05	58.74	0.85		21400	77000	151000	18500	71900	18400	454	13100	1598	6100	766	1280	140	506	54.4
MR13-14	30	4209	72200	17.1537	0.05	0.0032	0.00987	0.000260121	0.00291	3.9e-05	58.07	0.82		13300	71500	153000	19200	73800	17400	421	11210	1306	4650	571	912	93.1	329	35.9
MR13-14	31	5010	58400	11.6567	0.0497	0.0025	0.01008	0.000248637	0.002869	3.1e-05	58.72	0.78		18200	71800	150000	17600	67200	17800	445	11810	1470	5810	746	1222	132	510	53.1
MR13-14	32	7750	126800	16.3613	0.0498	0.0027	0.00962	0.000222676	0.002877	3.5e-05	57.9	0.63		30700	128000	279000	32500	132000	31700	747	20300	2390	8710	1080	1640	179	639	63.5
MR13-14	33	9230	102900	11.1484	0.051	0.0025	0.00968	0.000223516	0.002869	4.1e-05	58.06	0.7		38000	120000	263000	31200	127000	32400	790	22600	2760	10600	1330	2140	239	854	89
MR13-14	34	9040	101000	11.1726	0.0496	0.0027	0.00986	0.000232377	0.002894	3.4e-05	57.91	0.82		37300	130000	289000	32400	133000	33400	815	23200	2700	10200	1310	2110	229	850	86
MR13-14	35	8350	92000	11.018	0.05	0.0029	0.00965	0.00021696	0.002877	3e-05	58.4	0.68		33500	112000	231000	28200	115000	29800	700	20800	2390	9100	1170	1850	197	716	76
MR13-14	36	8500	93700	11.0235	0.0511	0.003	0.0096	0.000228823	0.002873	2.8e-05	58.06	0.61		34500	107000	230000	27600	114000	30100	680	20800	2420	9500	1150	1910	217	790	80
MR13-16	1	2880	31000	10.7639	0.0538	0.003	0.01139	0.000286513	0.00332	5.71814e-05	66.98	1.16312		18000	125000	248000	33000	127000	28400	764	19200	2040	6770	741	1030	86.2	244	24.6
MR13-16	2	2110	30100	14.2654	0.0565	0.0052	0.01181	0.000322927	0.003431	5.95011e-05	69.24	1.20208		13000	136000	255000	33300	129000	25400	822	16100	1580	4840	535	756	59.4	172	16
MR13-16	3	2563	31400	12.2513	0.053	0.0043	0.01189	0.000323587	0.003547	5.88075e-05	71.57	1.18076		14300	131000	268000	31800	118900	26000	741	16100	1640	5250	591	841	67.1	192	19
MR13-16	4	2750	29500	10.7273	0.0574	0.0032	0.01214	0.000263174	0.003612	5.78155e-05	72.87	1.16108		18400	118900	254000	32600	126000	26600	760	17600	1840	5900	679	992	83.9	225	21.3
MR13-16	5	2620	29700	11.3359	0.0507	0.0035	0.01194	0.000291508	0.003651	6.33554e-05	73.66	1.27158		17100	122000	255000	31700	120000	27900	630	18100	1790	5920	661	940	82	223	20.5
MR13-16	6	3430	29000	8.45481	0.0555	0.0029	0.01194	0.000324001	0.003671	6.42699e-05	74.1	1.29011		19100	125000	260000	33000	129000	29500	665	18400	1840	5900	666	904	72.7	210	20.6
MR13-16	7	3490	24930	7.14327	0.0521	0.0028	0.01225	0.000264318	0.003704	6.29609e-05	74.74	1.26393		23000	123000	249000	30600	124000	31500	577	22200	2330	7450	810	1090	92	249	23.6
MR13-16	8	1737	22590	13.0052	0.0518	0.0068	0.01293	0.000426634	0.003882	8.45722e-05	78.3	1.72969		11500	114000	227000	27700	98000	21200	586	12800	1200	3750	395	484	41.2	131	11.8
MR13-16	9	6720	27920	4.15476	0.0488	0.0014	0.01196	0.000247153	0.003741	5.46754e-05	75.48	1.10556		17100	140000	272000	34200	130000	40500	556	25700	2460	6320	518	515	37.1	75	5.34
MR13-16	10	6720	37620	5.59821	0.052	0.0015	0.01191	0.000253606	0.003744	6.1001e-05	75.53	1.23223		15200	128000	267000	33300	133000	40200	490	24800	2360	5950	483	484	29.8	71	5.73
MR13-16	11	4660	18920	4.06009	0.0488	0.0019	0.01182	0.00022591	0.00374	6.2462e-05	75.46	1.26155		16100	127000	270000	33800	133000	39800	560	25100	2340	6190	489	478	34.2	62.6	5.01
MR13-16	12	2500	22880	9.152	0.0512	0.0028	0.01213	0.000270381	0.003716	6.0057e-05	74.97	1.20602		17400	133000	251000	32500	126000	35100	560	22000	2020	5340	491	550	45.9	115	8.8
MR13-16	13	1791	19450	10.8599	0.0509	0.005	0.0123	0.000369378	0.003593	5.98921e-05	72.5	1.21		9400	122600	259000	29400	111100	23500	679	14600	1370	3730	359	450	35.6	84.8	8.9
MR13-16	14	1281	20050	15.6518	0.0578	0.0089	0.01208	0.000550666	0.003582	7.77272e-05	72.3	1.52398		7960	121900	265000	29900	110100	21600	644	12800	1167	3400	326	413	31.7	91	9.66
MR13-16	15	1343	20560	15.309	0.0556	0.0076	0.0119	0.000438021	0.003492	6.79079e-05	70.5	1.34588		9680	128000	270000	30400	117000	21900	717	14200	1330	3930	406	544	41.9	129	13.3
MR13-16	16	3810	29800	7.82152	0.049	0.0026	0.01188	0.000246283	0.003783	5.5024e-05	76.32	1.10598		11500	99000	212000	27500	108700	29900	461	20200	1900	5070	453	479	34	90.3	7.3
MR13-16	17	4150	27520	6.63133	0.0517	0.0024	0.01198	0.00024737	0.003786	5.77442e-05	76.38	1.16013		12700	117000	223900	27900	116000	31900	480	22000	2040	5520	488	563	40.3	97	8.3
MR13-16	18	4082	26310	6.44537	0.0528	0.0025	0.01203	0.000247916	0.00381	5.59057e-05	76.87	1.12365		11700	113100	221000	27700	115000	29900	455	21500	1950	5580	457	533	36.7	91.5	7.98
MR13-16	19	4360	34100	7.8211	0.0512	0.0023	0.01198	0.00024737	0.00381	6.14935e-05	76.86	1.24214		10600	105000	232000	27400	115100	31400	452	21800	1980	5190	449	515	35.5	94	7.41
MR13-16	20	6600	28120	4.26061	0.048	0.0017	0.0121	0.000229221	0.003801	5.78633e-05	76.69	1.16951		13700	107000	214000	26100	111000	31500	494	24000	2430	6370	506	463	27.5	62	4.52
MR13-16	21	3440	22160	6.44186	0.0506	0.0032	0.01216	0.000270684	0.00373	6.16398e-05	75.26	1.24509		17200	107000	224000	28100	115000	29200	519	21800	2120	6320	583	701	51.7	125	11
MR13-16	22	5920	26810	4.52872	0.0494	0.0022	0.01071	0.00020666	0.00338	5.10622e-05	68.2	1.03291		16100	109000	212000	26200	107000	29300	518	22900	2330	6640	588	659	49.6	136.2	13.19
MR13-16	23	8530	36600	4.29074	0.0474	0.0015	0.01246	0.000259483	0.003818	6.08262e-05	77.03	1.23611		17600	97000	200000	24800	107000	32600	497	27100	2830	7600	563	501	28.1	59.7	4.82
MR13-16	24	9570	27370	2.85998	0.0479	0.0018	0.01098	0.000236698	0.003325	5.34671e-05	67.09	1.08841		20300	104000	219000	25400	102000	25600	590	21200	2580	7660	723	775	49.8	123	9.99
MR13-16	25	1897	25900	13.6531	0.0529	0.0061	0.01193	0.000357943	0.003495	5.69387e-05	70.52	1.15816		8740	110000	226000	27700	103000	20400	668	13320	1245	3750	410	540	44.3	123	13
MR13-16	26	2098	27270	12.9981	0.0561	0.0052	0.01182	0.000348476	0.003545	6.4997e-05	71.5	1.27224		8600	114000	225000	27200	97800	20400	620	13400	1240	3710	407	548	43.2	124	13.1
MR13-16	27	2621	26830	10.2366	0.0551	0.0045	0.01235	0.000327441	0.003589	6.21498e-05	72.4	1.25505		11900	119800	234000	27600	109000	22400	646	15000	1480	4790	535	745	61.4	173	17.4
MR13-16	28	8360	42200	5.04785	0.0503	0.0019	0.01192	0.000239936	0.003821	6.01299e-05	77.08	1.20768		9510	105200	193000	25800	111000	31600	406	20500	1800	4930	426	456	31.7	79	6.53
MR13-16	29	8360	39700	4.7488	0.0509	0.0018	0.01198	0.000234077	0.003809	6.1486e-05	76.85	1.24206		8840	99300	199000	25800	111000	29900	394	20800	1730	4610	392	436	29	69	6.09
MR13-18	1	11790	42200	3.5793	0.05031	0.000998028	0.01289	0.00013	0.004029	6.41276e-05	81.28	1.29		7680	88600	199000	26700	119400	64400	39.1	48200	3330	5420	205	133.3	6.17	19.3	3.04
MR13-18	2	15150	66000	4.35644	0.05146	0.000963287	0.01292	0.00011	0.003988	6.19984e-05	80.45	1.25296		6360	86000	185000	24500	108000	62900	30.3	43600	2910	4260	180	117.5	5.2	21	2.84
MR13-18	3	13310	53900	4.04959	0.05006	0.000909086	0.01285	0.00013	0.003992	6.55225e-05	80.52	1.31746		21400	95300	192000	26500	119100	52700	54.8	40700	3460	8630	573	582	34.6	91	7.35
MR13-18	4	5590	58200	10.4114	0.0504	0.00121589	0.01221	0.00012	0.003777	5.916e-05	76.19	1.18471		12900	87800	193000	26200	112400	53500	286	38000	3010	6460	385	333	17.3	51.4	4.2
MR13-18	5	6770	64100	9.46824	0.0512	0.00112427	0.01296	0.00013	0.003947	6.385e-05	79.62	1.28411		9320	94600	190000	26400	119000	48000	91	32900	2450	4920	285	254	12.8	36.5	3.4
MR13-18	6	7680	94100	12.2526	0.05102	0.00108189	0.0122	0.00011	0.003749	5.88583e-05	75.63	1.18417		10650	96100	210000	26800	108700	29700	226	19100	1770	4670	345	376	23.5	69	5.38
MR13-18	7	7560	73200	9.68254	0.05117	0.00118739	0.01107	0.0001	0.003451	5.45315e-05	69.63	1.09716		16200	102000	208000	26800	103300	28700	349	20700	2220	6240	481	563	35.9	103.2	10.2
MR13-18	8	6380	107000	16.7712	0.05068	0.00103924	0.01232	0.00012	0.003776	6.02879e-05	76.18	1.21855		11400	92600	202000	27300	108000	29300	206	19300	1680	4490	339	362	22.9	59.8	5.24
MR13-18	9	6680	72700	10.8832	0.05046	0.00108845	0.01204	0.0001	0.003656	5.72967e-05	73.76	1.15843		13900	96000	207000	25700	103000	30300	375	21900	2050	5720	459	538	40.7	119.8	12.6
MR13-18	10	5320	91400	17.1805	0.05216	0.00114917	0.01222	0.0001	0.003753	5.72745e-05	75.71	1.14752		10600	99690	216000	24800	107600	27800	206	16700	1580	4270	326	371	23.1	61.5	5.47
MR13-18	11	8130	56300	6.92497	0.05103	0.00104362	0.01221	0.00011	0.003782	5.86626e-05	76.3	1.1859		17600	101000	218000	25800	105000	31400	617	22400	2240	6860	594	878	81.5	311	33.7
MR13-18	12	5880	48600	8.26531	0.05573	0.0011913	0.01224	0.00012	0.003806	6.11888e-05	76.77	1.2365		12140	101500	214000	26500	107700	30600	454	20600	1970	5620	463	638	57.2	191	21.7
MR13-18	13	10550	57800	5.47867	0.05344	0.00106207	0.01234	0.00012	0.00383	5.97331e-05	77.26	1.20182		16700	99400	208000	24600	99840	29500	442	20600	2070	6370	551	776	71.4	241	26.7
MR13-18	14	7550	38930	5.15629	0.05052	0.00113727	0.01213	0.00013	0.00381	6.30414e-05	76.86	1.27376		19300	91700	203000	26600	114000	35200	514	25000	2650	7980	694	980	89.9	348	38.6
MR13-18	15	4950	35340	7.13939	0.0516	0.00116362	0.01219	0.00011	0.003849	6.16417e-05	77.65	1.24575		17580	98600	222000	26900	113600	33100	464	22900	2320	6990	602	868	78.3	320	32.3
MR13-18	16	9920	43500	4.38508	0.05014	0.000929779	0.01292	0.00013	0.004038	6.53959e-05	81.44	1.32098		14300	86800	182000	24700	108300	51600	51.1	38000	3170	7050	459	387	20	52	4.61
MR13-18	17	6260	40900	6.53355	0.0494	0.000980373	0.01293	0.00012	0.004112	6.79819e-05	82.95	1.36691		12600	82500	181000	25300	111700	51000	56.1	37000	3140	6240	412	364	19.8	52.3	5.07
MR13-18	18	5270	51100	9.69639	0.0489	0.0010236	0.01241	0.00012	0.00375	5.94354e-05	75.65	1.20136		22800	86000	187000	24400	106400	41100	480	31200	3430	8970	712	812	60.2	185	15.7
MR13-18	19	12910	35600	2.75755	0.04945	0.000895766	0.01282	0.00012	0.004065	6.62766e-05	81.99	1.3327		19600	85800	188000	25400	116600	57400	39.6	45000	3790	8700	560	464	26.9	67.8	6.29
MR13-18	20	6380	101300	15.8777	0.05219	0.0010706	0.0124	0.00014	0.003791	6.47519e-05	76.49	1.30816		27200	77300	169000	20000	89300	29500	689	23900	2620	8360	865	1320	110	368	35.2
MR13-18	21	6140	97900	15.9446	0.05212	0.00108237	0.0126	0.00013	0.003838	6.58666e-05	77.43	1.33046		25800	82300	159000	20500	94100	29100	704	25200	2570	8500	841	1270	108.8	337	35.4
MR13-18	22	5560	89400	16.0791	0.05264	0.00114794	0.01253	0.00013	0.003826	6.44583e-05	77.17	1.2957		21000	87400	178000	21000	89600	27000	589	21900	2210	6960	699	991	89.4	267	27
MR13-18	23	5460	50700	9.28571	0.0514	0.00108648	0.01225	0.00014	0.003824	6.38066e-05	77.14	1.28283		21700	97000	203000	24200	101000	29600	595	21900	2200	6860	655	960	79.4	252	24.7
MR13-18	24	5350	51200	9.57009	0.05068	0.001204	0.01232	0.00014	0.003842	6.5906e-05	77.5	1.32463		19700	93000	199000	22700	95900	30800	547	22200	2160	6660	674	1013	81.7	249	24.5
MR13-18	25	10160	53800	5.29528	0.04829	0.000996932	0.01083	0.00012	0.003333	5.82958e-05	67.25	1.17831		23700	87000	199000	23400	101000	38900	426	35700	4200	10790	725	674	40.3	102	8.21
MR13-18	26	9960	52700	5.29116	0.04855	0.000975458	0.01081	0.00012	0.00332	5.62031e-05	66.99	1.13636		22200	84600	180000	21700	98700	35700	427	36700	4080	10730	720	647	38.1	88.3	7.6
MR13-18	27	10790	43150	3.99907	0.04849	0.00099314	0.01079	0.00011	0.003375	5.37216e-05	68.11	1.08092		26100	93900	191000	25000	105500	41100	449	36500	4250	10280	711	669	36.4	80.7	8.39
MR13-18	28	13170	15620	1.18603	0.04827	0.000942379	0.01093	0.00014	0.003494	6.25472e-05	70.49	1.26358		26500	92000	204000	24000	101100	43700	393	39000	4510	12010	763	667	42.2	105.7	10.44
MR13-18	29	11830	40400	3.41505	0.04848	0.00096259	0.01078	0.00012	0.003375	5.73935e-05	68.1	1.15384		24900	91000	200000	25540	110900	41800	455	37200	4260	9810	674	636	36.6	90	8.5
MR13-18	30	7710	120900	15.6809	0.04953	0.00108426	0.01104	0.00013	0.003387	5.81612e-05	68.35	1.17576		6390	84200	190000	24200	109000	26000	117	15200	1310	2850	187	199	10.8	28.4	2.3
MR13-18	31	8650	128100	14.8092	0.0498	0.00106061	0.01099	0.00012	0.003377	5.67741e-05	68.14	1.14152		6060	81500	176000	22700	99000	25700	109	14200	1270	2850	185	204.6	11.53	27.8	2.78
MR13-18	32	7960	109800	13.794	0.04992	0.00121834	0.01091	0.00011	0.003357	5.47132e-05	67.74	1.10652		6280	93900	197000	23900	101100	24100	109.2	13480	1230	2740	194	206	12.02	31.6	2.71
MR13-18	33	11870	77600	6.53749	0.05115	0.00108346	0.01074	0.00013	0.003305	5.67009e-05	66.69	1.14636		18600	82000	183000	21900	95000	29700	347	24100	2870	7700	519	531	32.4	75	6.85
MR13-18	34	11680	83500	7.14897	0.05216	0.001064	0.01074	0.00013	0.003339	6.10997e-05	67.37	1.22745		17400	90000	182000	22500	98600	29400	329	22000	2670	6880	474	510	31.4	68.8	6.76
MR13-18	35	10200	44500	4.36275	0.05108	0.00106318	0.01291	0.00015	0.004082	7.02282e-05	82.34	1.41145		10130	79500	157000	22900	103000	44900	44.9	35100	2810	5380	345	307	16.4	46.1	4.33
MR13-18	36	11950	45400	3.79916	0.04969	0.00102063	0.01289	0.00016	0.004024	7.09968e-05	81.16	1.42646		14300	78100	167000	23000	112000	53400	47.3	40300	3360	7400	451	386	22.3	57.2	5.6
MR13-18	37	7690	35700	4.64239	0.05085	0.00122067	0.01306	0.00015	0.004098	7.30624e-05	82.7	1.46828		10100	85700	177000	24000	109000	44200	57	34400	2630	5530	341	301	17.3	47	4.07
MR13-18	38	7890	55800	7.07224	0.05114	0.00113045	0.01304	0.00018	0.003977	7.26223e-05	80.2	1.44465		6390	86200	183000	25400	117000	49600	75	31600	2110	3740	199	164.7	7.01	24	2.53
MR13-18	39	7770	44700	5.7529	0.04941	0.00105593	0.01224	0.00015	0.003732	6.54966e-05	75.3	1.32301		20800	88500	188000	25300	115000	41300	482	32400	3380	8770	676	769	56.3	152	15.9
MR13-22	1	1932	45900	23.7578	0.0514	0.0013	0.01279	0.000248346	0.003839	8.2802e-05	77.44	1.67203		5630	111000	237000	28400	122000	30600	75	17300	1240	2790	196	173	9.7	21.5	1.74
MR13-22	2	1954	52200	26.7144	0.052	0.0012	0.01273	0.000242762	0.003858	8.20833e-05	77.82	1.65749		6250	108200	236000	28900	115000	31100	87	16300	1280	2690	201	169	9.9	26.6	2.11
MR13-22	3	1657	72700	43.8745	0.0527	0.0015	0.01278	0.000288621	0.003843	9.3362e-05	77.5	1.90066		4190	112300	225000	28400	112000	29000	70.3	13800	1014	2110	145	120	6.6	13.6	1.26
MR13-22	4	1651	72900	44.1551	0.0524	0.0016	0.01287	0.000277072	0.00385	9.02109e-05	77.67	1.82087		4130	111800	229000	28600	113000	26100	72.8	13870	1029	2010	136	125	6.28	17.6	1.67
MR13-22	5	1834	56200	30.6434	0.0522	0.0012	0.01273	0.000247454	0.003905	8.36637e-05	78.78	1.68956		5640	120000	230000	29800	118300	30500	86	16700	1290	2600	180	169	8.5	22.4	2.22
MR13-22	6	2890	62600	21.6609	0.0499	0.0012	0.01279	0.000239324	0.003975	8.56986e-05	80.19	1.73051		9230	106000	218000	27600	118000	30700	91	18000	1530	4000	333	406	27.2	73.2	7.07
MR13-22	7	3320	53900	16.2349	0.04949	0.00092	0.01262	0.000261777	0.003971	9.17798e-05	80.09	1.85725		9500	107000	242000	29300	120000	31600	75.9	19200	1590	4070	357	412	30.3	77.2	8.1
MR13-22	8	3418	37100	10.8543	0.05225	0.00099	0.01261	0.000240945	0.004046	8.85666e-05	81.61	1.78801		8910	119000	252000	31600	125100	34000	60.5	18800	1550	3790	322	354	23.9	63	5.95
MR13-22	9	3580	50900	14.2179	0.05102	0.00095	0.01262	0.000256178	0.004011	9.29745e-05	80.92	1.87662		9800	111300	235000	28100	121000	31300	68.8	19200	1600	4120	361	448	30.2	79	8
MR13-22	10	3860	53000	13.7306	0.0502	0.0012	0.01239	0.000252913	0.00401	9.00724e-05	80.89	1.82288		8460	113000	241000	28800	126000	33100	69.6	18900	1540	3560	307	347	23.3	59.2	6.19
MR13-22	11	2539	69900	27.5305	0.0513	0.0013	0.01291	0.000265833	0.004052	9.41885e-05	81.73	1.90074		7880	104200	210000	25300	107000	29900	74.8	17100	1410	3380	305	312	20.5	62	5.27
MR13-22	12	3840	70300	18.3073	0.0485	0.0011	0.01254	0.000260664	0.003912	8.69799e-05	78.91	1.75166		897	119000	227000	29700	113000	30200	129	11100	484	601	35.4	39.5	2.27	5	0.93
MR13-22	13	3691	40130	10.8724	0.049	0.0012	0.01272	0.000275063	0.003994	9.47724e-05	80.6	1.89698		5980	118900	240000	29700	114800	29700	99.8	15600	1270	2710	198	197	10	33	2.93
MR13-22	14	3660	45180	12.3443	0.0494	0.0011	0.01254	0.000266544	0.003978	9.5597e-05	80.3	1.9466		7760	113000	227000	28200	115000	30200	56.2	17200	1460	3470	283	324	20.2	53.7	4.88
MR13-22	15	3930	73400	18.6768	0.0501	0.0012	0.01297	0.000261182	0.003937	8.74299e-05	79.41	1.76068		5080	110000	222000	28300	113000	32000	102	16500	1103	2390	196	220	14.8	38.8	3.33
MR13-22	16	8930	66400	7.43561	0.05018	0.00078	0.012524	0.00023355	0.004019	8.68904e-05	81.08	1.75077		12300	109000	236000	29900	119000	31100	79	20300	1760	4760	443	571	39.8	110	11.6
MR13-22	17	6130	65300	10.6525	0.05104	0.00096	0.01268	0.000246711	0.003966	8.51626e-05	80	1.71956		6510	104000	209000	26300	114000	29300	100	15900	1152	2980	246	296	18.3	52.6	5.42
MR13-22	18	4939	70600	14.2944	0.0504	0.0012	0.012748	0.000236624	0.003951	8.35055e-05	79.71	1.68641		5800	122000	249000	30100	123000	33100	117.5	15800	1130	2450	199	233	13.2	40	4.1
MR13-22	19	7310	67300	9.20657	0.0503	0.00092	0.01253	0.000260525	0.003933	9.1123e-05	79.35	1.83439		5470	106700	228000	29400	114900	34500	103.2	17300	1202	2440	187	232	12.8	37.1	4.07
MR13-22	20	4520	69300	15.3319	0.0519	0.0013	0.01272	0.000275063	0.003956	9.30644e-05	79.79	1.87269		7650	104900	217000	26200	116000	30700	75.9	17400	1328	3320	281	363	21.6	59.7	5.52
MR13-22	21	11360	99810	8.78609	0.04936	0.00076	0.01238	0.000276936	0.003946	9.79406e-05	79.6	1.99361		642	116100	253000	31600	125800	30600	113	9440	407	526	29	35.4	1.56	5.23	0.85
MR13-22	22	10830	96300	8.89197	0.0489	0.00081	0.01224	0.000240203	0.003908	8.78008e-05	78.83	1.7725		534	94900	218000	28900	114400	27900	90	8260	335	415	23	34.4	1.5	4.8	0.49
MR13-22	23	16170	85800	5.30612	0.04882	0.0006	0.01215	0.000229484	0.003944	8.55047e-05	79.56	1.72265		1203	114000	247000	29900	121700	34000	98.7	12500	552	834	43.3	47.5	2.44	5.5	0.62
MR13-22	24	16770	80300	4.78831	0.04925	0.00059	0.01196	0.000258726	0.003907	9.55555e-05	78.8	1.92192		1764	103000	225800	29800	119000	33300	93.4	12500	654	1024	64.3	66	4.37	10.4	1.02
MR13-22	25	10880	88900	8.17096	0.04955	0.0007	0.01223	0.00028165	0.003918	9.80882e-05	79	1.98404		900	96000	220000	26400	104700	29400	79.8	9900	475	680	35.9	34.6	1.97	4.24	0.6
MR13-22	26	4620	55800	12.0779	0.0498	0.0011	0.01261	0.000273595	0.003887	9.13647e-05	78.42	1.83888		14000	102000	213000	24300	105000	27300	126	18000	1700	5290	511	747	55.9	164	17.6
MR13-22	27	6150	37900	6.1626	0.04853	0.00082	0.01252	0.000249401	0.003923	8.8068e-05	79.13	1.77784		18700	114000	233000	27400	115000	28800	93	19400	1870	6210	644	980	76.1	219	22.3
MR13-22	28	2840	29500	10.3873	0.0504	0.0014	0.01268	0.000262614	0.003917	8.70698e-05	79.01	1.75346		10000	110000	234000	27700	107000	25000	77	15700	1340	3880	390	533	39.4	108	10.81
MR13-22	29	5310	45700	8.6064	0.04977	0.00097	0.01268	0.000257033	0.003893	8.75339e-05	78.53	1.76717		12500	108200	227000	28700	108000	25700	76.3	15700	1440	4440	451	660	53	144	15.1
MR13-22	30	6110	36800	6.02291	0.0488	0.001	0.01252	0.000239585	0.003889	8.4491e-05	78.46	1.70625		17800	101300	210000	26300	106000	26000	90	17100	1750	5600	608	921	73.5	240	25.4
MR13-22	31	4350	68500	15.7471	0.051	0.001	0.01287	0.000249538	0.003986	8.83135e-05	80.41	1.77874		5230	94000	205000	24300	104600	27100	73.1	15200	1183	2680	187	172	9.98	24.3	2.21
MR13-22	32	4770	63200	13.2495	0.0504	0.00095	0.0127	0.000252017	0.003992	8.88562e-05	80.52	1.78935		5910	97000	201000	24800	99000	26600	72.4	14900	1133	2760	201	189	9.6	24.7	2.45
MR13-22	33	4760	63500	13.3403	0.04957	0.00095	0.01269	0.000242156	0.00395	8.60058e-05	79.67	1.73638		6450	100500	203400	25200	105000	25500	75.1	15900	1140	2810	200	204	11.2	26.4	2.29
MR13-22	34	4720	67500	14.3008	0.0501	0.0011	0.01276	0.0002479	0.003933	8.53018e-05	79.35	1.72263		6200	100000	211000	24600	105000	26100	74.3	16200	1160	2660	196	190	10.8	27	2.63
MR13-22	35	2980	84700	28.4228	0.0514	0.0014	0.01303	0.000267519	0.003925	8.72138e-05	79.17	1.7607		3560	94000	203000	24300	100400	25500	65	13200	938	1920	138	115	6.53	15.2	1.5
MR13-26	1	6220	39800	6.39871	0.0568	0.0024	0.01233	0.000238131	0.003809	6.75308e-05	76.84	1.359		16600	148000	299000	34600	124000	36100	802	26800	2680	7000	707	773	99.1	295	34.3
MR13-26	2	5220	39380	7.54406	0.0532	0.0027	0.01239	0.000258728	0.003789	7.12686e-05	76.44	1.4393		12900	140000	292000	33100	125000	33700	742	25000	2380	6480	603	642	78.4	225	22.9
MR13-26	3	5170	37300	7.2147	0.0532	0.0027	0.01227	0.000257438	0.003754	6.90711e-05	75.73	1.40099		14160	135000	301000	33300	121000	32800	743	24200	2410	6950	662	720	84.6	248	26.2
MR13-26	4	6400	35600	5.5625	0.0512	0.0022	0.01219	0.000242969	0.003738	6.71777e-05	75.42	1.35183		18800	135000	292000	34300	129000	36100	879	26900	2820	8750	871	1007	127	375	41.6
MR13-26	5	5080	30290	5.9626	0.0532	0.0021	0.01222	0.000230649	0.003733	6.88145e-05	75.3	1.38411		11300	146000	298000	32900	120000	28900	722	20300	2000	5800	531	574	63.1	204	22.2
MR13-26	6	5290	40400	7.63705	0.0503	0.0018	0.0123	0.000237782	0.003751	6.73406e-05	75.67	1.35497		13800	125000	289000	32300	119000	31600	840	24100	2400	7180	625	710	76.9	220	22.5
MR13-26	7	5220	39200	7.50958	0.0511	0.002	0.01236	0.000226436	0.003748	6.57015e-05	75.61	1.32755		13900	122000	265000	31100	118000	29900	800	22200	2230	7260	632	731	76.4	218	21.9
MR13-26	8	7630	37300	4.8886	0.0494	0.0016	0.01202	0.000234538	0.003679	6.58892e-05	74.22	1.33129		20800	122300	253000	32300	122000	31500	890	24200	2890	10200	930	1180	120	367	36.9
MR13-26	9	5350	40200	7.51402	0.0486	0.0021	0.01217	0.000249448	0.003709	6.91104e-05	74.84	1.39611		16200	111000	271000	32700	118000	29200	790	21800	2320	7920	664	870	78.5	228	24.9
MR13-26	10	5520	40800	7.3913	0.0512	0.0022	0.01217	0.000224108	0.00369	6.54876e-05	74.45	1.32334		16400	117000	276000	33100	125000	30600	850	23400	2440	8550	760	960	85.8	254	24.4
MR13-26	11	5540	38800	7.00361	0.0518	0.0022	0.01197	0.000233962	0.003723	6.699e-05	75.12	1.35358		17300	105100	273000	31900	123000	28600	759	21300	2310	8230	759	980	86.6	245	25.6
MR13-26	12	5410	36400	6.72828	0.0513	0.0025	0.01202	0.000241056	0.003687	6.76731e-05	74.39	1.36719		17700	110000	242000	31600	119000	28900	787	21600	2300	8200	742	942	90.2	257	25.5
MR13-26	13	4920	33000	6.70732	0.0512	0.0019	0.01196	0.000247153	0.003719	6.92313e-05	75.03	1.40436		21200	123100	274000	32800	126700	30500	704	23700	2580	9300	850	1110	97	280	29.3
MR13-26	14	5170	31000	5.99613	0.0537	0.0024	0.0121	0.000235462	0.003703	6.6191e-05	74.71	1.33744		23400	112400	263000	32000	128800	33800	799	25900	2940	10500	1009	1370	121	339	36.1
MR13-26	15	5760	28600	4.96528	0.0526	0.0025	0.01161	0.000223446	0.003635	6.88257e-05	73.33	1.3901		26500	115000	275000	33700	127000	32600	704	26300	3090	10620	993	1370	117	347	34.9
MR13-26	16	3888	25150	6.46862	0.0519	0.0026	0.01224	0.000250218	0.003774	6.70872e-05	76.15	1.35559		21300	125000	288000	33300	124900	28700	648	21100	2370	8310	879	1184	97.6	279	30.9
MR13-26	17	5060	28750	5.68182	0.0517	0.0019	0.01193	0.000240048	0.003766	6.98006e-05	75.97	1.40978		26500	113000	258000	33000	130000	32000	735	26300	3000	10750	1110	1600	131	390	37.6
MR13-26	18	4630	26370	5.69546	0.0503	0.0026	0.01199	0.000254452	0.003774	7.16986e-05	76.13	1.44168		24600	124000	282000	33900	133000	31600	875	23600	2690	9170	1012	1486	119.1	367	36.3
MR13-26	19	4740	29320	6.18565	0.0509	0.0025	0.01206	0.000235	0.003752	7.08268e-05	75.68	1.43024		24300	116000	239000	32100	116400	28700	824	21700	2610	8900	990	1470	118	350	36.4
MR13-26	20	4963	35500	7.15293	0.0525	0.0022	0.01196	0.000233847	0.0038	6.85055e-05	76.66	1.3839		24700	117000	262000	32800	125000	29300	793	21500	2430	8660	937	1375	104.1	322	33
MR13-26	21	3740	37800	10.107	0.0534	0.0028	0.01231	0.000257867	0.003776	6.76542e-05	76.18	1.36684		21700	118000	260000	32400	128000	29700	732	21000	2350	7890	855	1259	95.5	260	27
MR13-26	22	5140	23930	4.65564	0.0527	0.002	0.01184	0.000239043	0.003764	6.86202e-05	75.94	1.38056		29900	119000	258000	32200	126000	29200	836	22900	2670	9100	1130	1710	134	397	39.8
MR13-26	23	4190	31650	7.5537	0.0518	0.003	0.012	0.000261725	0.003736	7.37867e-05	75.38	1.48327		22300	123000	263000	32600	123400	29300	721	21500	2350	7610	860	1240	95.5	252	27
MR13-26	24	4560	36400	7.98246	0.0539	0.0026	0.01207	0.000235115	0.003705	6.56779e-05	74.75	1.32182		23800	126000	247000	32800	126000	29000	756	21200	2350	7450	849	1220	91.7	274	26.7
MR13-26	25	4700	36500	7.76596	0.0508	0.0027	0.01211	0.000248791	0.003729	7.43621e-05	75.24	1.50128		22700	112000	250000	32300	125000	29100	743	21300	2380	7920	898	1300	97	276	26.7
MR13-26	26	4590	34700	7.55991	0.0519	0.0026	0.01204	0.000241281	0.003742	6.66827e-05	75.5	1.342		25900	119000	256000	30800	118000	28100	699	20900	2300	7870	870	1300	100	283	27.7
MR13-26	27	4880	31300	6.41393	0.0491	0.0027	0.01203	0.000254877	0.003726	7.17544e-05	75.17	1.4427		24300	112000	235000	31300	121000	29000	755	21300	2290	7690	890	1280	96.9	271	28.6
MR13-26	28	2044	21490	10.5137	0.0732	0.0078	0.0127	0.000338659	0.003777	6.99342e-05	76.19	1.41245		18600	105000	214000	27100	98000	24800	686	16700	1960	6560	655	910	79	205	21.4
MR13-26	29	2330	18410	7.90129	0.0486	0.003	0.01199	0.000247479	0.003717	6.37936e-05	74.99	1.2844		26600	109000	234000	29600	112000	27500	779	19000	2350	8400	910	1340	122	361	38.9
MR13-26	30	2309	20120	8.71373	0.0519	0.0031	0.012	0.000247588	0.003709	6.36887e-05	74.83	1.28717		26100	116000	231000	28500	111000	27500	745	19900	2380	8280	930	1310	120	357	37.1
MR13-26	31	3140	27800	8.8535	0.0523	0.0025	0.01194	0.000221307	0.00374	6.61227e-05	75.45	1.33602		26000	106000	215000	27800	103000	25300	728	18600	2290	8050	888	1290	117	348	32.8
MR13-26	32	2668	27010	10.1237	0.0573	0.0033	0.01193	0.000261004	0.003694	6.66278e-05	74.52	1.34055		19800	122000	223000	28800	101700	24900	624	17300	1940	6500	659	940	81.8	240	23.9
MR13-26	33	1856	15030	8.09806	0.0563	0.0042	0.0119	0.00029114	0.003736	7.31402e-05	75.37	1.47029		11460	97200	194000	23100	79900	18400	483	12400	1340	4450	489	678	63.1	170	19.5
MR13-26	34	2115	16650	7.87234	0.0547	0.0032	0.01228	0.000310531	0.003707	7.09078e-05	74.79	1.42581		11800	102200	186000	20890	77300	17800	456	12600	1321	4400	490	662	58	170	17.6
MR13-26	35	2621	21060	8.0351	0.0573	0.0046	0.01194	0.000291508	0.003746	7.07553e-05	75.57	1.42893		13000	93300	175200	21000	77200	19000	451	13000	1500	5030	536	763	66.6	176	19.7
MR13-26	36	3469	27860	8.03113	0.0515	0.0041	0.01224	0.000310176	0.003743	7.32206e-05	75.51	1.47831		15000	85000	193000	22700	80900	21600	459	15500	1700	5700	576	779	64.1	194	20.1
MR13-26	37	3173	26790	8.44311	0.0491	0.0041	0.01227	0.000310442	0.0037	7.08255e-05	74.64	1.43025		13840	90500	188000	22400	79400	21100	460	14940	1680	5540	557	790	67	189	17.8
MR13-26	38	3178	28540	8.98049	0.0523	0.0035	0.01209	0.000292896	0.003731	7.37298e-05	75.4	1.49652		14700	99000	203000	24600	90900	23700	520	16600	1750	5880	626	818	69.2	201	21.5
MR13-26	39	4400	9010	2.04773	0.0484	0.0028	0.0116	0.000265096	0.003744	8.43975e-05	75.5	1.72411		22200	74900	151000	19400	68600	18400	539	13400	1630	6070	700	1080	103	317	32.3
MR13-26	40	3480	9100	2.61494	0.05	0.0028	0.01152	0.000256826	0.00371	7.61638e-05	74.8	1.57127		19100	68600	156000	17900	72300	19000	545	14700	1750	6120	722	1009	92.6	274	28.3
MR13-26	41	2380	12250	5.14706	0.0507	0.0041	0.01197	0.000332623	0.003686	7.65897e-05	74.4	1.56699		16300	73100	147000	17600	68400	17500	482	13300	1510	5220	603	896	79.4	257	27.1
MR13-26	42	2009	15840	7.88452	0.0489	0.0038	0.01214	0.000317428	0.003666	7.70707e-05	74	1.56272		12390	75400	157600	18500	68100	16800	421	11900	1330	4440	498	686	55.2	175	16.6
MR13-26	43	1853	15540	8.3864	0.0545	0.004	0.01188	0.000315207	0.003718	8.0463e-05	75	1.64488		12100	72900	167000	18700	67000	17000	425	12400	1386	4900	499	707	57	166.7	17
MR13-26	44	2797	24340	8.70218	0.0502	0.0036	0.01193	0.000253817	0.003697	7.40017e-05	74.58	1.49385		16500	91400	201000	23780	87500	22300	590	16100	1790	5730	644	864	73.2	216	19.47
MR13-26	45	3462	19750	5.70479	0.0466	0.0029	0.0119	0.000283306	0.003747	7.32667e-05	75.59	1.47923		21500	87100	209000	24200	87800	23400	630	17850	2080	6790	783	1101	106	306	30.9
MR13-26	46	3814	18740	4.91348	0.0497	0.0031	0.0119	0.0002465	0.003707	7.15326e-05	74.78	1.43813		22500	90000	215000	23600	90100	23500	645	17700	2000	6800	810	1184	107.2	298	32.9
MR13-26	47	4090	17770	4.34474	0.0464	0.0028	0.01195	0.000276099	0.003737	7.44524e-05	75.39	1.4964		22900	93900	206000	24900	90000	22700	613	17200	2010	6780	785	1160	104.8	298	31.6
MR13-26	48	4640	15380	3.31466	0.0491	0.0026	0.01186	0.000260285	0.003757	8.37848e-05	75.8	1.65311		17100	97000	211000	22300	80700	20200	596	15200	1750	5960	684	954	84.9	262	28.1
MR13-26	49	5100	14710	2.88431	0.0463	0.0025	0.01205	0.000262241	0.003748	7.79531e-05	75.6	1.57986		20500	98000	208000	23400	82600	21300	603	15700	1880	6140	676	986	87.3	273	26.6
MR13-27	1	6610	69100	10.4539	0.04919	0.00089	0.01399	0.000220164	0.004023	4.5e-05	81.15	0.9		17400	83600	200000	28000	119700	45900	94.4	31700	3110	7890	686	784	56.2	157	14.4
MR13-27	2	8330	44990	5.40096	0.05075	0.0008	0.01267	0.000212021	0.003945	5e-05	79.6	1		23700	97100	216000	28700	121000	43100	137	27400	2770	8540	753	790	54.2	140	10.6
MR13-27	3	8300	39710	4.78434	0.05121	0.00082	0.01237	0.000179448	0.003901	4.2e-05	78.69	0.84		22000	101700	228000	29000	123100	43300	124.8	24300	2193	7010	654	757	51.1	128.3	9.86
MR13-27	4	7490	37410	4.99466	0.05077	0.00097	0.01241	0.000187085	0.003929	4.6e-05	79.25	0.93		18600	105000	244000	30100	127000	41200	114	22200	2160	6430	583	682	48.7	110.2	9
MR13-27	5	8170	48600	5.94859	0.04967	0.0009	0.01267	0.000196349	0.003924	4.3e-05	79.15	0.86		21100	88000	200000	26600	120000	42900	123	27500	2690	8120	706	857	65.4	148.3	12.4
MR13-27	6	8630	45700	5.29548	0.05031	0.00083	0.0125	0.000180347	0.003896	4.2e-05	78.59	0.84		24800	99550	224000	28900	126400	44300	135.8	27100	2760	8400	680	856	57.3	125	10.5
MR13-27	7	6470	50200	7.75889	0.0517	0.00095	0.0121	0.000170414	0.003856	3.8e-05	77.79	0.77		20900	89000	215000	27900	123000	50400	94	32000	2840	7530	685	786	59.6	151	14.7
MR13-27	8	9480	45370	4.78586	0.0508	0.0008	0.01194	0.000191719	0.00379	4.5e-05	76.46	0.91		24000	96100	208000	27900	121400	44000	139	26300	2560	7520	721	1085	89.8	221	22.4
MR13-27	9	7290	68900	9.4513	0.04992	0.00093	0.01241	0.000187085	0.003832	4.5e-05	77.3	0.9		24400	88600	196000	26900	120300	46600	97	31700	3310	9140	860	1056	76.2	187	19.2
MR13-27	10	7810	52700	6.74776	0.0528	0.0011	0.01227	0.000209655	0.003843	5e-05	77.5	1		13700	101200	226000	30800	136000	42400	100.1	22900	2150	5290	469	542	43.9	95.5	8.74
MR13-27	11	6120	58600	9.57516	0.0529	0.0012	0.01346	0.000201537	0.004126	4.4e-05	83.23	0.88		4960	92300	231000	30000	125000	51900	68	25900	1630	2900	190	199	12.71	35.3	3.77
MR13-27	12	12190	44700	3.66694	0.05099	0.00077	0.012355	0.000148841	0.003961	2.5e-05	79.9	0.51		23300	105000	221700	28500	122000	43900	140	34000	3640	9900	750	803	55.4	125	11.7
MR13-27	13	11960	45700	3.82107	0.0507	0.00069	0.01237	0.000159065	0.00393	3.1e-05	79.27	0.62		22200	99500	231000	27900	120000	43400	132	31100	3260	9200	721	714	48.1	112	11.6
MR13-27	14	10510	42650	4.05804	0.05043	0.00084	0.012398	0.000157417	0.003943	3.3e-05	79.55	0.67		19400	109000	247000	31100	125600	37500	128	24800	2970	7880	650	700	42.4	105	9.1
MR13-27	15	10870	44400	4.08464	0.05131	0.00075	0.01234	0.000179242	0.003905	3.9e-05	78.77	0.79		20900	109900	241000	30800	120100	39700	130	26200	3190	8260	695	725	45.8	111	10.3
MR13-27	16	10250	98800	9.63902	0.05321	0.0008	0.01371	0.000218395	0.004146	4.8e-05	83.62	0.97		1810	86000	204000	30000	128400	67400	60.6	34500	1940	1900	49.3	33.3	1.29	8.7	1.18
MR13-27	17	6550	70900	10.8244	0.05281	0.00096	0.01192	0.000259053	0.003721	6.2e-05	75.1	1.2		10500	104000	239000	31200	125000	44700	103	26500	2390	5300	370	360	20.5	56	5.6
MR13-27	18	6320	61800	9.77848	0.0534	0.001	0.01318	0.000207295	0.004108	4.5e-05	82.87	0.91		14500	91900	212000	28600	122700	46300	96.1	34600	3540	7660	459	358	15.9	39.9	3.44
MR13-27	19	5870	61000	10.3918	0.05174	0.00089	0.01337	0.000208508	0.004138	5e-05	83.5	1		14600	101700	229000	30000	127000	44000	88	31100	3160	7030	479	446	23.5	61.8	5.67
MR13-27	20	7080	59800	8.44633	0.05278	0.00086	0.01263	0.000196091	0.003972	4.6e-05	80.13	0.92		17000	98800	224000	30800	123200	42000	101.6	26900	2900	7450	587	631	40.4	102	9.84
MR13-27	21	7640	66900	8.75654	0.05189	0.00092	0.01224	0.00020948	0.003826	5.1e-05	77.2	1		21700	105000	232000	29300	124600	43300	102	29600	3220	9020	753	871	60.8	171	15.8
MR13-27	22	6770	77500	11.4476	0.0512	0.001	0.01219	0.000193286	0.003803	4.3e-05	76.72	0.87		20500	104100	224000	28500	124200	42800	91	29200	3100	8410	709	789	58.4	164	16.3
MR13-27	23	6470	73900	11.4219	0.0505	0.001	0.01205	0.000184717	0.003776	4.3e-05	76.18	0.88		19400	112000	243000	30800	126000	40800	86.8	28000	2970	8000	678	768	49.8	144	13.3
MR13-27	24	8080	70900	8.77475	0.05006	0.00091	0.01191	0.000191533	0.003759	5.1e-05	75.8	1		21700	94000	217000	29300	121900	42500	105.8	30100	3630	9350	776	891	58.2	155	13
MR13-27	25	4740	78200	16.4979	0.0562	0.0013	0.01369	0.000210574	0.00411	5e-05	82.9	1		1950	110000	266000	33500	133000	42100	83	17600	982	1350	61.3	49.7	1.88	7.4	0.77
MR13-27	26	2049	46300	22.5964	0.0551	0.0018	0.01409	0.000244648	0.004189	5.6e-05	84.5	1.1		1200	115000	266000	34600	133000	31200	30.8	10400	569	830	44.7	47.1	1.86	5.7	0.76
MR13-27	27	11000	54400	4.94545	0.04981	0.00081	0.01322	0.000215353	0.004147	5.7e-05	83.7	1.1		5390	106000	257000	31800	121000	38700	27.7	20500	1850	3510	223	182	8.5	18.2	1.96
MR13-27	28	15750	70200	4.45714	0.05116	0.00095	0.01313	0.00034589	0.004055	9.5e-05	81.8	1.9		6200	108000	265000	33700	125000	40900	20.2	21500	1900	3800	238	194	9.6	22.1	2.25
MR13-27	29	5050	65000	12.8713	0.0498	0.001	0.01226	0.000164714	0.00382	3e-05	77.07	0.61		13700	107000	234000	30300	117900	37000	90	18700	1850	5080	529	628	50.5	154	13.2
MR13-27	30	13840	12260	0.885838	0.04839	0.00061	0.01276	0.000162117	0.003903	8.6e-05	78.7	1.7		20400	96000	227000	30900	146000	54700	139	35800	3280	9000	715	800	56.6	181	15.6
MR13-27	31	10170	34900	3.43166	0.04899	0.0007	0.012594	0.000151383	0.00391	2.8e-05	78.87	0.57		23400	101000	224000	28200	113000	46700	132	32500	3690	9230	768	820	56.5	171	16
MR13-27	32	9340	38430	4.11456	0.0496	0.00097	0.01176	0.000154369	0.003709	2.9e-05	74.83	0.58		24800	94000	218000	27100	114000	47900	112	36200	3890	10200	833	822	55.2	146	12.7
MR13-27	33	9070	36100	3.98015	0.04907	0.00089	0.01183	0.000161539	0.003733	3.4e-05	75.3	0.68		21900	95000	224000	27500	118000	48900	114.2	36600	3970	10400	825	796	55.3	145	13.9
MR13-27	34	8590	41100	4.78463	0.04986	0.00092	0.011723	0.000149639	0.003742	3.4e-05	75.5	0.68		22700	93700	213000	26900	122000	45700	106.5	34600	3630	10100	762	786	53.9	149	15.1
MR13-27	35	5680	59200	10.4225	0.0506	0.0012	0.0137	0.00019588	0.004213	3.8e-05	84.97	0.76		6800	90000	216000	29800	142000	66700	41.5	42200	2810	4720	197	134	5.89	16.6	2.65
MR13-27	36	4760	50100	10.5252	0.0496	0.0011	0.01406	0.000228404	0.004175	5e-05	84.2	1		20200	85000	184000	23700	102000	39700	65.6	29300	2870	8250	657	678	45.8	102.6	10.5
MR13-27	37	5120	44430	8.67773	0.052	0.0012	0.01269	0.000204215	0.004	5.4e-05	80.7	1.1		17300	97200	204000	27400	121000	39200	86	24500	2350	7380	600	630	42.4	104.3	12.3
MR13-27	38	5240	49800	9.50382	0.0513	0.0011	0.01218	0.000217337	0.003836	5.5e-05	77.4	1.1		19600	107000	218000	29900	127000	41700	74.7	27200	2570	7960	716	807	59.4	157	16.7
MR13-27	39	6690	57600	8.60987	0.0491	0.001	0.01222	0.000178418	0.003735	4e-05	75.35	0.8		23600	84000	183000	23900	114000	45000	83.1	35900	3730	11300	880	890	59.3	145	14.3
MR13-29	1	11580	48200	4.16235	0.04838	0.00056	0.01129	0.000251169	0.003501	4.92576e-05	70.65	0.98955		26500	102000	235000	28400	101300	36700	398	25900	3430	9890	910	1030	76.8	244	19.8
MR13-29	2	14200	41500	2.92254	0.04846	0.00055	0.01112	0.000248116	0.003514	4.86441e-05	70.9	0.977281		26400	103400	254000	28700	108100	36900	427	28100	3560	11400	1030	1160	92	264	22.6
MR13-29	3	16310	44400	2.72226	0.04853	0.00051	0.01115	0.000248654	0.00351	4.79217e-05	70.82	0.962895		27800	105000	240000	28300	103000	38300	327	27300	3770	11300	1040	1230	95.5	278	24
MR13-29	4	18900	43700	2.31217	0.04865	0.00049	0.01114	0.000243401	0.003534	4.48114e-05	71.3	0.901029		34300	95400	227000	26400	95000	35800	370	27000	3780	12200	1170	1450	123	388	33.3
MR13-29	5	6390	36100	5.64945	0.04848	0.00093	0.01139	0.000262284	0.003501	5.06982e-05	70.63	1.0181		25000	115900	263000	31000	107700	36200	450	25300	3320	10000	860	980	68.9	207	16.6
MR13-29	6	15600	47100	3.01923	0.04708	0.00054	0.01148	0.000250432	0.003501	4.78572e-05	70.65	0.96856		23200	106000	244000	28300	97000	43100	541	33900	3930	10300	694	617	39.6	103	9.18
MR13-29	7	16300	53000	3.25153	0.0484	0.00055	0.01124	0.00025027	0.003482	4.8418e-05	70.25	0.972669		24200	111400	242000	27900	91000	35000	517	24600	3230	9370	832	908	78.3	238	21.6
MR13-29	8	17410	44900	2.57898	0.04795	0.00049	0.01114	0.000253061	0.003499	5.06847e-05	70.6	1.02519		36800	108600	234000	26600	97000	38400	640	32100	4350	14500	1290	1530	132	380	34
MR13-29	9	14640	47500	3.24454	0.04864	0.00066	0.01134	0.00025659	0.003496	4.99388e-05	70.53	1.00297		27400	130000	241000	28500	97000	33900	498	24900	3280	10500	850	1010	73	239	20.2
MR13-29	10	21360	50500	2.36423	0.04841	0.00059	0.01113	0.000252885	0.003488	4.91671e-05	70.38	0.994775		27000	109000	242000	27600	93600	35100	543	26200	3450	10620	860	1018	81.4	265	22
MR13-29	11	6000	41400	6.9	0.05	0.0011	0.01159	0.000265765	0.003499	4.99593e-05	70.59	1.01058		26200	118200	242000	29400	106000	31500	735	24500	2940	9110	850	980	67.3	198	18.3
MR13-29	12	12070	58200	4.82187	0.04882	0.00081	0.01133	0.000256413	0.003479	4.83969e-05	70.2	0.979335		27000	101500	229000	29100	104900	38500	453	27200	3350	10630	928	1028	76.7	238	21.6
MR13-29	13	17090	56700	3.31773	0.04917	0.00063	0.01114	0.000248475	0.003498	4.78357e-05	70.57	0.967989		34700	103000	232000	28900	102700	37600	463	29200	3830	12100	1090	1220	105	335	28.4
MR13-29	14	14990	50000	3.33556	0.04908	0.00065	0.01125	0.000255	0.003502	5.14392e-05	70.66	1.03293		33500	114000	239000	30000	101500	37100	471	27800	3620	11800	1010	1190	98	297	26.7
MR13-29	15	16230	54800	3.37646	0.04922	0.00067	0.01127	0.000255353	0.003496	4.85168e-05	70.53	0.974653		32400	112000	242000	29700	99200	38800	480	28600	3570	12600	1087	1237	102	314	28.4
MR13-29	16	22270	41300	1.85451	0.04876	0.00049	0.01119	0.000249372	0.003569	4.97336e-05	72	0.999041		39300	109100	236000	30100	104500	38800	435	28400	3840	13500	1180	1450	108	354	31.3
MR13-29	17	27000	38090	1.41074	0.04837	0.0004	0.01098	0.00024561	0.003518	5.009e-05	70.98	1.01326		42100	107800	231000	28500	106000	41200	436	28900	4050	14500	1226	1510	130	397	37.2
MR13-29	18	22410	46000	2.05266	0.04879	0.00056	0.01112	0.000248116	0.003523	4.94111e-05	71.09	0.999711		37700	109000	243000	30000	102200	39500	380	28600	3880	13000	1180	1410	113	361	33.8
MR13-29	19	18140	41900	2.30981	0.04885	0.00047	0.01105	0.000242572	0.003532	4.80799e-05	71.27	0.966143		42200	99600	228000	29300	109300	40300	386	28700	4030	13800	1278	1580	141	446	43.6
MR13-29	20	21140	48800	2.30842	0.04867	0.00053	0.01107	0.000251829	0.003404	4.64722e-05	68.68	0.940642		39900	104400	229000	27800	95700	35600	390	27300	3490	12900	1150	1370	118	352	32
MR13-29	21	16210	41800	2.57866	0.049	0.00062	0.01006	0.000229306	0.003271	4.84216e-05	66.01	0.979776		25300	114000	269000	30800	102600	48200	521	38000	4670	10860	656	574	36.3	97	8.5
MR13-29	22	16510	47800	2.89522	0.04952	0.00066	0.0092	0.000231206	0.002946	5.19579e-05	59.46	1.05043		24700	115000	250000	28700	98400	48000	710	38800	4760	11180	695	581	35.9	98.8	8.31
MR13-29	23	16540	48400	2.92624	0.0487	0.00058	0.0103	0.000228989	0.003326	4.73309e-05	67.11	0.950691		24800	111800	239000	26800	100000	48000	507	38600	4590	10150	661	543	34.9	95.2	8.25
MR13-29	24	18570	49400	2.6602	0.04894	0.00061	0.01029	0.00023823	0.003298	5.16337e-05	66.54	1.04405		24500	119000	241000	27800	97400	47100	547	36800	4770	10860	634	549	33.2	89	7.38
MR13-29	25	18560	48800	2.62931	0.04886	0.0006	0.01097	0.000250073	0.00351	5.07592e-05	70.82	1.0194		32400	109000	253000	33000	105800	43300	417	28400	3940	11600	1010	1130	89	257	23.4
MR13-29	26	18700	54140	2.89519	0.04887	0.00055	0.01109	0.00025709	0.003544	5.39629e-05	71.51	1.09091		30000	119000	250000	31500	104000	41600	485	28400	3760	11300	950	1050	80	233	20.5
MR13-29	27	13060	70400	5.39051	0.04929	0.00067	0.01142	0.000258005	0.003537	4.9509e-05	71.37	1.00166		28800	125000	253000	29800	99300	34400	605	23800	3390	9910	939	1034	82.2	239.5	20
MR13-29	28	20530	54100	2.63517	0.04801	0.00053	0.01074	0.000241328	0.003426	5.16855e-05	69.12	1.03762		31500	105500	252000	31100	107900	42700	505	27400	3970	11340	983	1051	82.6	239	20.5
MR13-29	29	19750	73900	3.74177	0.04896	0.00062	0.01113	0.000252885	0.003516	5.07998e-05	70.94	1.02749		34200	110000	239000	28100	94900	36300	617	26700	3990	11700	1101	1302	101.3	305	28.3
MR13-29	30	37530	87500	2.33147	0.05381	0.00089	0.01149	0.000269087	0.003625	6.90573e-05	73.1	1.40133		24700	128000	266000	32900	122000	25900	3900	16720	2010	7550	962	1490	149.2	511	56.4
MR13-29	31	39200	55000	1.40306	0.05207	0.00072	0.01119	0.000258817	0.003681	6.26818e-05	74.3	1.2414		36000	99000	236000	28300	98000	44100	490	27200	4350	12400	1090	1260	111.7	343	30.5
MR13-29	32	46000	73200	1.5913	0.0517	0.0016	0.011	0.000255539	0.00357	6.62203e-05	72	1.31076		33100	92700	248000	29400	114900	58200	565	34500	4920	13130	980	1050	82	283	22.9
MR13-29	33	20570	69800	3.39329	0.0534	0.0018	0.01138	0.000267211	0.0035	5.44483e-05	70.61	1.09282		35000	87000	221000	25900	93000	45400	383	30300	4480	13200	1044	1157	102	330	30.1
MR13-29	34	23110	52700	2.2804	0.04994	0.0005	0.01112	0.000248116	0.003581	5.49621e-05	72.25	1.10328		33700	111000	286000	30000	105600	45100	554	27600	3860	11400	930	1010	91	252	24
MR13-29	35	17620	65600	3.72304	0.04878	0.0007	0.01133	0.000261242	0.00349	5.36169e-05	70.41	1.08388		32900	106700	255000	28000	98100	39100	420	26000	3760	10520	930	1105	87.5	265	24.2
MR13-29	36	18040	65800	3.64745	0.0505	0.0016	0.01138	0.000267211	0.003519	5.53416e-05	71	1.11847		28300	95800	253000	27400	102000	44200	583	33300	3910	11320	793	770	52.8	144.2	12.93
MR13-30	1	12210	112400	9.20557	0.05367	0.000803236	0.01084	0.00015	0.00348	9.78601e-05	70.2	1		35500	169000	360000	41500	187000	29300	1720	20000	2510	10430	1388	2060	221	779	93.8
MR13-30	2	10460	101900	9.74187	0.04996	0.000755661	0.01113	0.00014	0.003576	9.64456e-05	72.14	0.89		29900	193000	392000	47400	214000	32700	1840	22200	2550	10450	1430	2120	225	811	103.7
MR13-30	3	9790	94900	9.69356	0.05328	0.000770507	0.01109	0.00017	0.00357	0.000101814	72	1.1		27800	182000	379000	45000	226000	31400	1610	21500	2420	9700	1376	2080	216	721	92
MR13-30	4	9540	85200	8.93082	0.05594	0.00089371	0.01094	0.00014	0.003568	9.96686e-05	72	1		28400	163300	355000	41900	162000	29200	1629	20460	2310	9540	1262	1950	214	694	90
MR13-30	5	9390	75300	8.01917	0.05125	0.000916856	0.01095	0.00015	0.003539	9.75609e-05	71.41	0.97		29800	174000	390000	44400	207000	32300	1830	20700	2490	9610	1366	2020	219	754	97.2
MR13-30	6	8500	73200	8.61176	0.0791	0.00153003	0.01029	0.0003	0.003175	0.000120231	64.1	1.9		29600	174000	365000	43900	195000	30000	1730	19700	2310	8980	1278	2020	199	664	90.2

## Sheet: S2 Xenotime U-Pb TE
S2: Xenotime U-Pb data														Xenotime trace element data
														(%)						(ppm)
Sample		spot	Pb (ppm)a	U (ppm)a	Th (ppm)a	Th/Ua	207Pb/206Pb	2s %	206Pb/238U	2s %	206Pb/238U Date (Ma) c	2s abs		Y	La	Ce	Pr	Nd	Sm	Eu	Gd	Tb	Dy	Ho	Er	Tm	Yb	Lu
MR13-05	1	1	7.68	10800	1561	0.144537	0.04823	2.49571	0.01049	2.40441	67.25	1.61834		1.297	3.93	9.91	1.164	4.62	1.59	230	11250	1074	4970	400	802	97.4	486	63.8
MR13-05		2	10.28	13880	2068	0.148991	0.0478	2.89425	0.01067	2.29452	68.43	1.55112		1.33	3.85	9.12	1.045	4.36	1.389	214	9710	910	4300	361	774	92.1	513	67.4
MR13-05		3	5.86	7810	1246	0.159539	0.0481	3.53152	0.01008	2.37976	64.63	1.54156		1.267	3.45	8.05	0.953	4.06	1.26	264	9710	877	4300	371	760	94	456	60.8
MR13-05		4	12.04	11560	2361	0.204239	0.0474	3.06358	0.01117	2.46004	71.6	1.7466		1.32	5.86	12.55	1.354	5.17	1.385	277	10720	923	4610	390	814	96.2	453	60.6
MR13-05		5	17	16950	3294	0.194336	0.04723	2.63463	0.01103	2.47067	70.73	1.72661		1.38	5.41	11.53	1.26	4.87	1.29	297	9840	972	4370	381	791	94.9	464	59.1
MR13-05		6	16.47	17170	3270	0.190448	0.04652	2.69452	0.01093	2.59077	70.1	1.84543		1.347	4.82	11.4	1.35	4.88	1.37	307	10600	1010	4630	402	852	100	515	65
MR13-05		7	17.25	18010	3356	0.186341	0.04767	2.72173	0.01102	2.47144	70.7	1.73188		1.362	5.69	13.8	1.41	5.44	1.549	336	11300	1007	4890	402	797	97.3	492	61.4
MR13-05		8	14.69	38920	2869	0.0737153	0.04693	2.28642	0.01104	2.36815	70.78	1.68286		1.39	4.71	9.83	1.11	4.15	1.65	291	12800	1290	5370	339	651	76.4	416	52.1
MR13-05	2	1	15.35	39800	3033	0.076206	0.04777	2.31824	0.0109	2.42771	69.9	1.70156		1.47	4.38	10.7	1.16	4.61	1.72	280	13200	1300	5520	337	621	73.8	394	50.8
MR13-05		2	34.78	26910	6860	0.254924	0.04745	2.35501	0.01112	2.36327	71.28	1.6701		1.33	6.92	14	1.58	6.07	1.57	403	11700	1060	4690	368	769	95	494	60.9
MR13-05		3	20.69	14830	3920	0.264329	0.04664	2.67711	0.01132	2.91462	72.6	2.08766		1.39	5.01	10.99	1.32	5.19	1.6	332	11700	1110	4860	406	797	94.3	501	63
MR13-05		4	7.29	6170	1451	0.23517	0.0482	3.69929	0.01101	2.47222	70.6	1.73024		1.45	4.39	10.1	1.219	5.09	1.48	314	12100	1170	5220	407	852	96.8	540	68.4
MR13-05		5	6.53	5020	1237	0.246414	0.0483	4.04822	0.01089	2.65406	69.8	1.84087		1.47	4.21	10.7	1.31	5.14	1.52	325	12090	1130	4950	405	824	94.1	491	63.8
MR13-05		6	8.36	5780	1609	0.278374	0.0476	3.73235	0.01136	2.60718	72.8	1.88678		1.47	4.9	11.4	1.293	5.38	1.64	356	12490	1114	4890	384.2	784	97.1	472	63
MR13-05		7	22.08	14100	4387	0.311135	0.04767	2.736	0.01111	2.31715	71.25	1.6342		1.44	6.87	14.8	1.63	6.07	1.6	403	12280	1135	4970	407	833	99.4	540	69.3
MR13-05		8	14.61	14520	2932	0.201928	0.04765	2.55811	0.01108	2.41511	71.02	1.70881		1.337	4.01	9.9	1.13	4.15	1.47	259	12400	1160	4830	348	678	75.1	397	44.9
MR13-05	3	1	10.06	10370	1991	0.191996	0.0479	2.89109	0.01114	2.46229	71.4	1.74333		1.31	5.23	11.4	1.243	4.34	1.45	281	11600	1096	4800	353	703	82.8	435	52.8
MR13-05		2	9.79	10580	1932	0.182609	0.04829	2.63708	0.01119	2.40767	71.72	1.72047		1.36	5.27	12	1.33	4.48	1.46	288	12600	1180	4990	375	728	84.6	424	50.7
MR13-05		3	11.31	11270	2217	0.196717	0.0477	2.69269	0.01117	2.36028	71.6	1.70206		1.39	4.63	10.25	1.157	4.68	1.53	276	12960	1200	5060	361	689	79.9	401	47.6
MR13-05	4	1	26.39	15880	5650	0.355793	0.04691	2.40907	0.01019	2.22779	65.33	1.45935		n/a	n/a	n/a	n/a	n/a	n/a	n/a	n/a	n/a	n/a	n/a	n/a	n/a	n/a	n/a
MR13-05		2	32.12	24250	7030	0.289897	0.04709	2.33777	0.01029	2.47487	66	1.64402		n/a	n/a	n/a	n/a	n/a	n/a	n/a	n/a	n/a	n/a	n/a	n/a	n/a	n/a	n/a
MR13-05		3	28.31	18620	6050	0.324919	0.04734	2.34543	0.01023	2.31862	65.64	1.52704		n/a	n/a	n/a	n/a	n/a	n/a	n/a	n/a	n/a	n/a	n/a	n/a	n/a	n/a	n/a
MR13-05		4	27.92	22550	6260	0.277605	0.04682	2.47172	0.00993	2.28629	63.67	1.45796		n/a	n/a	n/a	n/a	n/a	n/a	n/a	n/a	n/a	n/a	n/a	n/a	n/a	n/a	n/a
MR13-05		5	27.26	15480	5990	0.386951	0.04741	2.52406	0.00998	2.28361	63.99	1.46843		n/a	n/a	n/a	n/a	n/a	n/a	n/a	n/a	n/a	n/a	n/a	n/a	n/a	n/a	n/a
MR13-12	1	1	6.64	12710	1719	0.135248	0.04719	2.66743	0.007914	2.24668	50.82	1.1417		0.909	2	5.72	0.804	3.2	1.5	66.5	10490	1085	4200	278	543	73.8	459	54.9
MR13-12		2	11.34	17320	2997	0.173037	0.04639	2.42156	0.007978	2.3024	51.23	1.17737		1.01	2.28	5.9	0.83	3.51	1.54	72	10600	1090	4170	280	532	74.4	481	58.6
MR13-12		4	9.73	28280	2544	0.0899576	0.04634	2.16335	0.00793	2.20169	50.92	1.12162		0.959	1.97	5.61	0.824	3.55	1.52	67.6	10640	1052	4240	289	523	76.4	467	56.7
MR13-12		5	10.68	23010	2856	0.12412	0.0465	2.25652	0.008029	2.24567	51.55	1.15471		0.995	2.17	5.83	0.882	3.81	1.68	76.2	11900	1170	4400	298	575	77.2	495	60.7
MR13-12		8	9.34	23630	2491	0.105417	0.04774	2.28652	0.007728	2.26404	49.63	1.12524		1.1	2.4	6.89	1.02	4.06	1.66	71.1	11300	1150	4440	316	617	83.5	485	61.8
MR13-12	2	1	7.54	16210	2135	0.131709	0.04728	2.4897	0.007497	2.28598	48.15	1.09921		1.028	2.25	5.9	0.874	3.56	1.75	69	12000	1140	4350	293	560	75.7	451	54.8
MR13-12		2	13.09	29570	3512	0.118769	0.04693	2.07699	0.007998	2.17814	51.35	1.11729		1.02	3.27	8.4	1.17	4.58	1.8	67.1	12220	1180	4620	308	588	80.2	501	60.3
MR13-12		3	10.65	28260	2853	0.100955	0.04736	2.17167	0.007918	2.15716	50.84	1.09635		1.08	3.65	9.59	1.238	4.84	1.76	57.3	12200	1150	4410	309	600	81.1	499	63.1
MR13-12		4	9.26	27730	2541	0.0916336	0.04708	2.38865	0.007886	2.23121	50.63	1.12932		1.086	4.58	11.4	1.56	5.35	1.92	54.1	12500	1198	4610	326	644	82.5	529	62.1
MR13-12		8	18.19	43100	4810	0.111601	0.04766	1.91483	0.008002	2.21406	51.38	1.13845		1.05	4.53	12.1	1.55	5.9	1.85	50.1	12200	1120	4570	308	607	83.2	511	66
MR13-12	5	1	11.15	29200	3020	0.103425	0.04791	2.14922	0.00787	4.87629	50.5	2.42076		1.09	2.52	7.1	1.05	4.2	1.79	60.8	11880	1161	4410	332	624	86	547	64.2
MR13-12		2	12.67	33340	3189	0.0956509	0.04704	2.02781	0.00809	2.64476	51.93	1.36777		1.076	2.62	6.89	1	3.93	1.65	62.2	11600	1120	4420	316	626	83.5	537	62.7
MR13-12		6	14.11	28030	3700	0.132001	0.04794	2.17448	0.008092	2.24768	51.95	1.16637		1.09	2.98	7.32	1.009	4.21	1.7	57.3	11400	1040	4120	305	584	84.7	481	64.8
MR13-12	3	4	9.7	21900	2470	0.112785	0.04621	2.22035	0.00803	2.91238	51.5	1.50695		0.9	3.56	9.6	1.21	5.1	1.59	38.3	11100	1010	4170	295	574	77	479	58.2
MR13-12	4	1	15.53	25590	4141	0.161821	0.04704	2.10006	0.007864	2.28559	50.49	1.15468		n/a	n/a	n/a	n/a	n/a	n/a	n/a	n/a	n/a	n/a	n/a	n/a	n/a	n/a	n/a
MR13-12		2	11.04	20720	3039	0.14667	0.0464	2.16228	0.007906	2.22454	50.76	1.12727		1.13	2.95	8.4	1.14	4.88	1.68	45.7	11300	1037	4400	311	648	83.1	520	62.7
MR13-12		3	10.34	22290	2766	0.124092	0.04707	2.08721	0.007982	2.33377	51.25	1.19278		1.15	5.22	12.9	1.59	6.4	1.86	35.9	12600	1060	4700	321	629	87.6	548	67.5
MR13-12		6	13.15	11620	3779	0.325215	0.04715	2.58791	0.007824	2.33312	50.24	1.17031		1.2	3.96	10	1.3	5.31	1.64	46.1	12300	1040	4830	336	645	85.5	515	60.8
MR13-12		7	7.76	18220	2178	0.119539	0.04647	2.31468	0.007774	2.27322	49.92	1.13036		1.14	3.89	10.3	1.401	5.41	1.77	47.1	11800	1016	4300	328	627	88.1	552	67.9
MR13-12		8	13.63	26200	3730	0.142366	0.04624	2.09989	0.008	2.31962	51.37	1.18977		1.14	5.73	13.26	1.8	6.99	1.95	40.8	12200	1140	4870	360	666	94	582	67
MR13-12		9	15.97	29710	4170	0.140357	0.04806	2.14671	0.00809	2.41843	51.94	1.26392		1.115	4.46	11.4	1.44	6.12	1.86	45.4	12600	1100	4600	348	646	87	528	62.2
MR13-12		10	13.55	15880	4060	0.255668	0.0475	2.26368	0.007754	2.3189	49.79	1.1524		1.18	4.36	11.63	1.54	6.24	1.8	42.7	12600	1112	4660	350	696	90	568	69
MR13-12	6	1	15.1	31300	4270	0.136422	0.04692	2.08945	0.007903	2.25313	50.74	1.14487		1.16	5.23	13.3	1.73	7.47	2.02	53.3	13100	1130	4670	334	647	86.9	534	65.3
MR13-12		2	10.5	21580	2935	0.136006	0.04732	2.14632	0.007939	2.26855	50.97	1.15831		1.14	3.53	9.66	1.329	5.79	1.96	51.2	12350	1080	4370	313	614	76.7	501	60.7
MR13-12		3	11.18	21400	2920	0.136449	0.04733	2.10806	0.007998	2.33899	51.35	1.19964		1.201	3.47	8.4	1.17	4.95	1.67	50.8	12300	1045	4430	321	659	87.3	525	66.1
MR13-12		6	12.27	25880	3302	0.127589	0.04732	2.0358	0.008042	2.28577	51.63	1.17948		1.157	3.69	9.65	1.233	5.59	1.77	54	12690	1070	4670	338	690	90.7	532	65.7
MR13-14	1	1	18.63	16270	4295	0.263983	0.04651	2.26608	0.00924	2.13206	59.28	1.25808		1.445	4.06	10.6	1.367	5.53	1.49	286	11600	1047	4890	455	996	128.7	735	93
MR13-14		2	18.23	15630	4091	0.26174	0.04724	2.34255	0.00924	2.29095	59.3	1.33836		1.33	4.15	9.8	1.251	5.14	1.369	278	10680	1003	4500	426	859	117	728	88.3
MR13-14		3	19.61	16110	4449	0.276164	0.04735	2.21235	0.00917	2.1403	58.81	1.26023		1.3	4.34	9.91	1.31	5.41	1.37	279	10320	911	4500	414	846	118.1	672	83.7
MR13-14		4	16.75	12120	3786	0.312376	0.04754	2.36623	0.00918	2.29951	58.9	1.33438		1.3	5.03	10.8	1.31	5.33	1.31	268	9970	891	4650	429	923	124.9	728	83.9
MR13-14		5	19.77	15940	4421	0.277353	0.0471	2.26604	0.00912	2.14627	58.53	1.26447		1.3	4.08	9.65	1.224	4.87	1.292	247	9270	854	4340	398	841	114.3	684	85.3
MR13-14		6	19.32	15700	4342	0.276561	0.04711	2.33009	0.009128	1.77134	58.57	1.03651		1.193	3.93	9.04	1.173	4.87	1.231	244	9550	922	4340	402	885	111.8	620	78.3
MR13-14		8	17.36	12730	3693	0.290102	0.04985	2.2861	0.00926	2.12974	59.44	1.27399		1.52	6.05	12.6	1.56	6.21	1.59	286	11930	1113	5220	465	1003	128.8	734	93.3
MR13-14	2	1	21.14	18370	4792	0.26086	0.0461	2.26114	0.009156	1.67867	58.75	0.984988		1.367	4.61	9.978	1.315	5.43	1.46	273	11600	1053	4970	461	927	125	716	90.7
MR13-14		2	20.67	18140	4750	0.261852	0.04649	2.38159	0.00922	1.91661	59.14	1.12385		1.46	5.08	10.5	1.395	5.47	1.49	252	10720	1030	5040	442	939	125.3	700	93.2
MR13-14		3	20.9	17730	4771	0.269092	0.04701	2.23674	0.00919	2.13793	58.95	1.2617		1.43	4.58	10.52	1.343	5.5	1.4	261	10460	952	4650	427	889	119	665	89.8
MR13-14		4	24.03	17000	5390	0.317059	0.04855	2.15323	0.009535	1.80074	61.18	1.10194		1.41	5.12	10.13	1.33	5.51	1.45	257	11450	1008	5260	451	915	129	727	96.9
MR13-14		7	22.65	16130	5250	0.32548	0.04679	2.25847	0.009289	1.74597	59.61	1.03942		1.37	4.56	10.03	1.361	5.19	1.451	244	10260	982	4830	410	897	124	685	91.9
MR13-14	5	1	19.97	20340	4680	0.230088	0.04645	2.21969	0.009194	1.71797	59	1.0116		1.302	4.62	10.57	1.36	5.12	1.276	264	9980	950	5070	418	910	118	625	80
MR13-14		2	21.69	21660	4977	0.229778	0.04655	1.94999	0.009223	1.78359	59.18	1.05495		1.44	5.72	11.6	1.5	5.64	1.38	300	10500	997	5130	450	928	116.3	641	80.8
MR13-14		3	24.71	25610	5880	0.229598	0.04684	1.93155	0.009134	1.71003	58.62	1.00178		1.34	5.41	11.3	1.44	5.52	1.347	249	9820	933	4970	428	887	117.2	604	74.5
MR13-14		5	22.92	22900	5320	0.232314	0.04685	2.02882	0.0091	1.76127	58.4	1.02385		1.4	6.17	12.41	1.62	6.05	1.532	213	10820	1018	5040	378	866	116	671	84.4
MR13-14		6	23.55	24560	5540	0.22557	0.04617	1.97053	0.009175	1.78043	58.87	1.04565		1.373	5.86	11.7	1.65	6.29	1.62	223	11700	1160	5120	408	900	115.9	655	86.1
MR13-14		7	20.17	21960	4853	0.220993	0.04716	2.49457	0.00908	1.99915	58.26	1.15161		1.49	5.83	12.5	1.75	6.15	1.64	229	11480	1065	5180	419	866	118	678	83
MR13-14		8	15.85	17740	3631	0.204679	0.04628	2.35465	0.009036	1.78842	57.99	1.03452		1.349	5.45	12.4	1.56	5.79	1.48	205	10240	1010	4830	394	831	116	661	80.1
MR13-14	3	1	83.8	26600	18890	0.71015	0.04695	2.31846	0.00917	1.85451	58.86	1.09636		1.263	4.56	8.97	1.028	4.6	1.26	243	9950	928	4450	374	868	108.2	612	80.1
MR13-14		2	72.8	28350	16530	0.583069	0.04743	2.14915	0.009159	1.78133	58.78	1.04451		1.22	4.49	9.91	1.102	4.72	1.166	225	9130	890	4330	369	822	111	616	81.8
MR13-14		3	58.6	27450	13490	0.491439	0.04668	2.00352	0.009188	1.84056	58.96	1.08585		1.22	4.73	11	1.072	4.9	1.259	232	10000	918	4500	375	830	108.4	654	86
MR13-14		4	45.4	24690	10390	0.420818	0.04639	2.08229	0.00921	1.76118	59.1	1.04326		1.212	4.52	10.76	1.113	4.94	1.233	244	9900	880	4330	373	823	108	589	80.3
MR13-14		5	37.88	22970	8520	0.370919	0.04783	2.26229	0.00923	1.9158	59.25	1.11905		1.252	5.05	10.73	1.18	4.91	1.26	232	9650	879	4210	364	814	98.6	572	82.4
MR13-14		6	29.46	20220	6740	0.333333	0.04694	2.01279	0.009187	1.79156	58.95	1.0575		1.234	4.86	10.4	1.131	4.72	1.198	217	9160	901	4490	370	861	104.8	588	80.6
MR13-14		7	17.68	12640	4143	0.327769	0.04832	2.40764	0.00907	1.86161	58.18	1.10023		1.15	4.97	10.5	1.15	4.81	1.22	211	9210	846	4060	386	848	111	602	79.2
MR13-14		8	12.39	11280	2907	0.257713	0.0467	2.44215	0.009073	1.83563	58.22	1.06525		1.28	5.14	11.11	1.2	4.95	1.265	194	9660	928	4400	383	825	108.6	632	85.5
MR13-14	4	1	6.78	14920	1596	0.106971	0.04677	2.04487	0.009217	1.81999	59.14	1.07659		1.303	6.25	12.2	1.33	5.24	1.87	191	12200	1150	4900	366	747	110.8	691	95.3
MR13-14		2	14.66	16920	3505	0.207151	0.0473	2.76737	0.0093	2.71088	59.6	1.57773		1.29	5.74	12.2	1.36	5.31	1.66	199	11100	1006	4630	348	769	108.1	645	89.1
MR13-14		3	15.17	16220	3611	0.222626	0.04748	2.07392	0.00921	1.7499	59.1	1.03285		1.283	4.81	10.65	1.181	5.15	1.361	158	10100	871	4340	368	844	120.3	639	88.9
MR13-14		4	16.11	17050	3792	0.222405	0.04677	2.16476	0.00927	1.84762	59.51	1.11015		1.31	4.79	11.3	1.23	5.39	1.53	180	10740	1019	4640	402	881	117	659	86
MR13-14		5	12.18	11910	2880	0.241814	0.04756	2.20708	0.00921	1.91742	59.12	1.1175		1.41	4.95	11.2	1.27	5.29	1.58	170	10410	949	4630	404	882	112.2	616	90.4
MR13-14		6	19.51	21390	4720	0.220664	0.04727	2.16811	0.00909	1.99819	58.33	1.16552		1.311	5.71	13	1.35	5.58	1.55	171	10700	949	4530	396	884	122.9	681	89.5
MR13-14		7	19.97	21640	4660	0.215342	0.04724	1.97924	0.009331	1.78334	59.87	1.06906		1.3	4.74	11.6	1.31	5.4	1.6	159	11100	978	4640	402	888	117.6	663	88.6
a conentration data are normalized to the primary reference material and are accurate to ~ 10%
b Rho value is calculated following the method outlined in Paton et al., (2010)
c Age calculations are based on the decay constants of Jaffey et al. (1971)
* high common Pb, rejected

## Sheet: S3 Zircon U-Pb TE
S3: Zircon U-Pb data															Zircon trace element data (ppm)
						Measured Isotopic Ratios				Apparent Isotopic Age		207Pb-corrected Isotopic Age
Sample	spot	Pb (ppm)a	U (ppm)a	Th (ppm)a	Th/Ua	207Pb/206Pb	2s %	206Pb/238U	2s %	206Pb/238U c	2s abs	206Pb/238U d	2s abs e		La	Ce	Pr	Nd	Sm	Eu	Gd	Tb	Dy	Ho	Er	Tm	Yb	Lu
DC2	1	0.216	1229	8.1	0.00659072	0.04799	1.50936	0.00986	2.20779	63.23	1.40157	63.1934	1.39264		0.02	0.253	0.035	0.022	1.07	0.026	4.5	2.66	37.7	12.09	51.422	14.853	178.113	28.6
DC2	2	2.16	1373	48.4	0.0352513	0.04961	2.00374	0.00979	2.36121	62.8	1.48984	62.6182	1.47648		0.007	0.707	0.068	0.36	3.75	0.154	17.1	8.23	110.8	37.6	161.009	40.8337	413.585	66
DC2	3	0.663	455.9	12.18	0.0267164	0.05	2.65149	0.00944	2.11103	60.59	1.28274	60.357	1.27419		bdl	0.261	0.012	bdl	0.88	0.022	4.34	1.97	28.16	9.59	43.0734	10.1089	97.5094	16.45
DC2	4	2.18	4236	55.4	0.0130784	0.04803	0.912249	0.00948	2.17736	60.83	1.31885	60.7627	1.31936		0.042	0.527	0.074	0.62	4.78	0.104	20.4	10.3	121	30.6	111.009	23.5928	220.377	30
DC2	5	11.66	4079	395.7	0.0970091	0.04762	0.833177	0.009307	1.9154	59.72	1.14452	59.6881	1.14004		0.02	4.22	0.012	0.65	9.5	0.63	49.9	22.68	306.3	101.9	434.862	96.1543	895.849	127.7
DC2	6	2.84	2300	83.2	0.0361739	0.04839	1.08354	0.00945	1.97862	60.6	1.20176	60.5435	1.19488		bdl	1.39	0.043	0.15	3.59	0.191	18.8	9.41	129.1	42.5	175.229	40.2288	372.075	56.1
DC2	7	4.45	2898	44	0.0151829	0.0512	2.59176	0.009431	1.84689	60.51	1.11845	60.2082	1.11309		0.028	0.525	0.072	0.51	3.85	0.137	14.58	7.07	78.6	18.65	60	12.3218	97.3585	11.82
DC2	8	1.05	419	38.8	0.0926014	0.0489	2.50848	0.0088	2.03039	56.51	1.14346	56.3552	1.14434		bdl	0.57	0.024	0.03	1.41	0.087	8.67	3.46	52.1	18.6	84.3119	21.8417	240.755	40.6
DC2	9	2.064	495.1	75.7	0.152898	0.048	2.55351	0.00857	2.05122	55	1.11826	54.9489	1.12771		0.013	0.73	0.033	0.15	2.81	0.225	19.4	8.34	123	44.2	194.037	49.1915	493.585	80.6
DC2	10	19.4	5749	664.8	0.115638	0.04829	0.858718	0.009347	1.79475	59.97	1.07739	59.8932	1.072		0.019	5.58	0.045	0.89	13.3	0.81	64.7	28.79	375.3	121.2	482.569	105.547	952.453	135.8
DC2	11	6.79	1139	228.8	0.200878	0.05193	1.80943	0.008612	1.82724	55.28	1.01114	54.944	1.00391		bdl	2.89	0.025	0.44	6.69	0.504	32	13.78	202.4	72	323.394	81.0307	788.679	132.4
DC2	12	2.48	3280	57.8	0.017622	0.04894	1.00344	0.008812	1.87416	56.55	1.05885	56.429	1.05525		0.022	0.8	0.235	1.73	8.8	0.172	28.5	10.87	127	40.9	173.853	44.8932	451.321	75.5
DC2	13	2.05	569.4	76.7	0.134703	0.04797	1.967	0.008608	1.8863	55.26	1.04127	55.1939	1.04087		0.014	1.48	0.003	0.25	3.33	0.264	19.47	9.27	140.2	51	237.156	59.2208	628.679	104.1
DC2	14	2.41	654	54.3	0.0830275	0.0532	1.9503	0.00948	2.17736	60.8	1.33208	60.367	1.31273		bdl	0.81	0.002	0.18	2.28	0.13	11.6	6.01	78.6	28.2	131.651	31.5208	320	53.7
DC2	15	1.63	301.6	36.3	0.120358	0.0588	3.94598	0.00872	1.88558	55.97	1.0562	55.1471	1.04997		bdl	0.79	0.022	0.01	1.91	0.182	11.37	5.11	75.1	27.94	130.642	33.5585	359.245	65.6
DC2	16	2.34	2950	47.3	0.0160339	0.04956	1.09929	0.008874	1.87061	56.96	1.06446	56.7804	1.05983		0.009	0.78	0.099	0.93	5.6	0.129	22.8	10.07	127.7	38.4	160.092	36.615	338.868	51.3
DC2	17	2.275	514.5	86.8	0.168707	0.047	2.3975	0.00852	1.98434	54.7	1.09616	54.698	1.08591		0.011	0.694	0.013	0.11	4.04	0.291	20.8	9.84	136.6	48.5	220.183	52.9008	553.208	91.2
DC2	18	2.562	1925	83.5	0.0433766	0.04754	1.04332	0.00936	1.92391	60.03	1.15975	60.033	1.15195		bdl	1.36	0.017	0.11	3.69	0.27	22.4	10.9	156	51.3	220.183	51.261	473.208	70.2
DC2	19	12.19	4084	419.6	0.102742	0.04778	0.881344	0.009303	1.88095	59.7	1.12272	59.6505	1.11889		0.002	4.8	0.037	0.78	11.5	0.76	62.8	30.7	398	134.4	547.706	121.626	1065.66	165
DC2	20	3.43	551	63.8	0.115789	0.0607	3.33567	0.00897	2.08559	57.58	1.21361	56.5858	1.1856		bdl	1.12	bdl	0.19	3.02	0.208	18.9	9.23	128	44.3	201.376	49.7009	498.868	84.5
DC2	21	4.12	3700	78.3	0.0211622	0.05004	0.887678	0.009422	1.8912	60.45	1.14349	60.2392	1.13618		0.009	1.08	0.198	1.18	8	0.228	34.2	15.59	207.2	67.9	294.037	71.0013	699.623	112.5
DC2	22	7.72	2060	257	0.124757	0.04908	1.21694	0.00991	1.94733	63.56	1.23459	63.4256	1.23294		0.008	1.88	bdl	0.22	3.66	0.176	20.7	9.5	123	38.5	154.587	33.1127	292.83	45.2
DC2	23	9.9	2921	317.9	0.108833	0.04969	0.975303	0.00949	1.91582	60.9	1.1713	60.6994	1.1599		0.012	4.13	0.109	1.66	18.8	1.1	86.5	37.6	482	155.5	619.266	136.112	1187.17	183.3
DC2	24	6.31	4610	96.4	0.0209111	0.0504	1.33555	0.0096	2.79495	61.6	1.71214	61.3457	1.71018		0.134	2.88	1.32	10.5	37.1	0.67	74	24.1	262	67.9	251.376	57.6289	552.453	85.8
DC2	25	8.36	3447	285.7	0.0828837	0.04749	0.919264	0.0095	2.03852	60.97	1.2305	60.9319	1.23875		0.014	3.37	bdl	0.54	7.05	0.5	41.1	19.32	262.5	83.9	351.376	79.5979	730.566	108.4
DC2	26	3.77	629.6	105.1	0.166931	0.0553	3.29625	0.00867	1.97239	55.64	1.11419	55.077	1.0911		0.019	1.43	bdl	0.16	2.85	0.192	14.28	6.24	87.2	30.02	135.275	32.5715	329.509	56.2
DC2	27	6.4	3065	225	0.0734095	0.04774	0.950779	0.00938	1.98374	60.19	1.17892	60.1457	1.18988		0.031	3.43	0.13	0.4	6.97	0.536	40.5	20.38	278	92.8	333.176	88.5129	874.296	121.7
DC2	28	1.231	318.7	40.8	0.12802	0.0491	2.89835	0.0086	2.12297	55.2	1.17832	55.0643	1.1703		0.002	0.83	0.025	0.22	2.81	0.13	11.5	5.75	79.1	29.05	122.567	32.1416	338.329	53.5
DC2	29	2.27	987	70.1	0.0710233	0.04725	1.69043	0.0099	2.0073	63.53	1.28126	63.508	1.27316		bdl	1.58	0.02	0.22	3.81	0.308	23.5	11	159	54.3	169.178	53.9674	502.469	80.3
DC2	30	1.509	2530	46.8	0.018498	0.04798	1.05422	0.00907	2.07616	58.23	1.19605	58.1464	1.20401		0.06	1.38	0.39	3.38	14.5	0.321	38.7	15.2	173	51	160.546	47.2811	455.572	66
DC2	31	21.61	6210	775	0.124799	0.04737	0.771543	0.00923	1.99507	59.21	1.19599	59.2144	1.17794		bdl	8.17	0.077	1.65	20.6	1.25	99.1	45.2	598	188.3	690.521	156.649	1597.85	199.1
DC2	32	18.06	5050	587	0.116238	0.04929	0.913175	0.00939	1.92202	60.23	1.1624	60.0921	1.15185		0.013	4.53	0.059	0.9	10.8	0.66	58	26.4	327	103.9	334.903	89.1496	757.053	115.9
DC2	33	6.7	2923	233.7	0.0799521	0.04846	1.04633	0.009445	1.82037	60.6	1.105	60.5062	1.09869		0.005	4.32	0.051	0.9	12.5	0.792	68.2	34.4	466	158.3	559.322	145.505	1370.07	197.7
DC2	34	0.805	317.4	18.36	0.057845	0.052	2.74207	0.00914	2.14079	58.62	1.23927	58.2971	1.2485		0.022	0.371	0.011	0.25	0.93	0.062	6.01	2.92	43.2	14.12	51.7891	9.81412	160.79	23.28
DC2	35	12.1	3566	72.7	0.020387	0.0594	2.41358	0.00929	1.92839	59.59	1.15393	58.6958	1.13336		0.019	0.932	0.063	0.79	6.98	0.112	24.51	11.41	142.8	43.8	151.915	41.156	361.778	59.3
DC2	36	6.46	2208	193.2	0.0875	0.05092	1.46977	0.00982	1.95314	63.01	1.2447	62.7057	1.2229		0.005	3.21	0.062	1.07	12.6	0.844	69.4	31.3	399	125.2	405.681	96.5582	1001.59	137.6
DC2	37	18.12	4831	641.8	0.13285	0.04921	0.947888	0.00931	1.9271	59.73	1.15578	59.5878	1.14521		0.003	6.24	0.096	1.45	14.1	0.95	67.3	31	403	132.8	429.849	110.805	1001.59	146
DC2	38	0.76	1418	12.7	0.00895628	0.04818	1.48466	0.00912	2.14287	58.53	1.23818	58.4513	1.24969		0.006	0.233	bdl	0.091	1	0.041	5.29	3.17	40.8	10.86	31.0734	5.1445	80.3951	8
DC2	39	0.586	177.5	16.2	0.0912676	0.0492	3.89664	0.00896	2.23638	57.5	1.30108	57.3551	1.28623		0.021	0.269	0.021	0.07	0.69	0.037	3.31	1.77	27.2	9.34	36.9429	14.1672	110.543	21.3
DC2	40	17.52	5245	603.7	0.1151	0.04771	0.848684	0.009464	1.86128	60.72	1.12639	60.6849	1.12645		0.007	4.34	0.065	0.88	11.3	0.559	58.9	26.55	348	113.9	426.397	136.131	911.144	127.2
DC2	41	2.922	718.3	93.1	0.129612	0.05061	1.75817	0.00868	1.95824	55.71	1.08578	55.4691	1.08529		0.011	2.07	0.053	0.411	5.1	0.308	26.62	12.47	180.6	68.2	305.556	92.6009	880.996	137
DC2	42	0.548	2129	18.17	0.00853452	0.04714	1.20036	0.0091	2.00529	58.43	1.17393	58.3999	1.16816		0.011	0.418	0.023	0.24	1.76	0.069	9.38	5.16	74.8	24.9	75.9573	25.3268	231.136	44.3
DC2	43	4.8	727	106.3	0.146217	0.0624	5.47347	0.00823	2.24835	52.86	1.19909	51.8174	1.18528		bdl	1.3	0.014	0.37	3.1	0.232	16.8	7.4	103.8	35.6	146.736	48.2791	432.123	65
DC2	44	0.828	281.3	28.84	0.102524	0.049	2.90408	0.00856	1.9811	54.98	1.09377	54.8158	1.08802		bdl	0.83	0.05	0.14	2.37	0.158	11.31	5.21	75.4	28.82	108.757	44.3218	422.074	68.7
DC2	45	1.636	489.5	61	0.124617	0.0473	2.17718	0.00855	2.0531	54.86	1.12897	54.8694	1.12623		0.003	1.036	0.05	0.37	3.26	0.221	18	8.48	125.8	44.7	233.051	49.862	455.572	79.7
DC2	46	2.139	432.8	64.1	0.148105	0.0514	3.34802	0.00895	2.08751	57.42	1.17968	57.1323	1.1955		0.009	0.787	0.025	0.38	2.82	0.172	16.1	7.72	108.2	39.7	153.641	60.151	455.572	80.5
DC2	47	1.741	563.3	64.3	0.114149	0.0479	2.35459	0.00857	1.88865	55.01	1.03787	54.9558	1.03867		0.009	1.32	0.041	0.37	3.75	0.28	20.1	9.52	131.1	49	198.525	65.6913	623.062	94.7
DC2	48	13.9	5450	117.3	0.0215229	0.0554	2.4035	0.00916	1.93696	58.77	1.13745	58.1728	1.12751		0.073	1.49	0.432	3.93	18.2	0.179	48.4	18.69	203.5	59.4	195.072	64.1083	592.914	78.8
DC2	49	2.6	435.8	46.6	0.10693	0.0625	3.4	0.0088	2.03039	56.51	1.14346	55.3886	1.13153		0.013	1.14	0.055	0.38	2.73	0.183	17.8	8.36	115.7	41.9	163.999	53.8193	401.975	84.4
DC2	50	3.42	490.8	61.4	0.125102	0.0619	4.39276	0.00896	2.15988	57.51	1.25267	56.4361	1.23099		0.03	1.19	0.042	0.4	3	0.146	15.89	7.45	103.4	35.37	172.63	37.9901	465.621	75.6
DC2	51	2.707	2597	84.7	0.0326146	0.04751	1.09902	0.00919	2.06519	58.96	1.22406	58.9482	1.21416		0.023	1.6	0.33	3.1	14.7	0.358	43.1	18.4	207	64.3	233.051	61.734	623.062	90.6
DC2	52	5.21	732	149.1	0.203689	0.0555	2.75227	0.008439	1.98399	54.18	1.07753	53.6	1.0666		0.001	1.46	0.055	0.38	3.13	0.225	17.21	7.38	101	34.98	141.557	40.3645	401.975	61.6
DC2	53	23.41	6460	808.6	0.12517	0.04748	0.770568	0.00952	1.9736	61.05	1.20758	61.0605	1.20174		bdl	9.07	0.091	1.56	18	1.28	94.4	43.2	564	182.3	728.5	204.988	1591.15	204.9
DC2	54	2.21	1904	25.8	0.0135504	0.05146	1.29443	0.00922	2.06251	59.16	1.22653	58.846	1.21086		bdl	0.501	0.048	0.78	3.27	0.1	13.2	5.84	70	21.4	67.3258	31.6584	211.037	30.8
DC2	55	0.934	1889	30.11	0.0159397	0.04713	1.14353	0.00926	1.93034	59.4	1.15709	59.4242	1.14417		0.022	0.619	0.048	0.265	1.66	0.075	9.27	4.68	66.3	21.36	94.9466	16.4624	190.938	26.18
DC2	56	32.98	7180	1193	0.166156	0.04807	0.735444	0.00955	1.91219	61.36	1.18298	61.2068	1.16717		0.008	8.39	0.065	1.89	20.4	1.56	94.2	41.5	532	173.9	543.785	169.373	1266.22	191.6
DC2	57	2.744	1693	11.39	0.0067277	0.05209	1.17697	0.00989	2.00804	63.47	1.27443	63.0578	1.26391		bdl	0.241	0.017	0.34	1.53	0.043	7.28	4.08	56.1	17.51	89.7677	11.0805	144.041	23.6
DC2	58	3.2	586.2	76.5	0.130502	0.0566	3.92155	0.00882	1.96099	56.61	1.12663	55.9344	1.10513		0.002	1.66	bdl	0.47	3.95	0.308	22.4	10.47	150.1	55.1	257.219	72.0229	669.959	112.7
DC2	59	7.41	2577	205.5	0.0797439	0.04992	1.16425	0.00928	1.99124	59.57	1.17083	59.3431	1.17872		0.022	2.36	0.017	0.87	11.3	0.78	73.8	36.3	479	170	574.859	161.458	1644.75	214
DC2	60	45.07	8139	1477	0.181472	0.04965	0.85985	0.009453	1.88383	60.65	1.14091	60.4665	1.13601		bdl	8.9	0.076	1.89	21.9	1.51	101.6	44	549	168.8	612.837	162.249	1296.37	181.5
DC2	61	22.4	6280	785	0.125	0.04751	0.801864	0.00941	2.04603	60.4	1.21718	60.3549	1.23136		0.031	5.97	0.053	1.23	15	0.89	77.4	34.13	439	137.2	422.944	141.672	947.992	151.2
DC2	62	3.504	804.8	125.8	0.156312	0.04712	1.7351	0.00884	1.92112	56.74	1.0882	56.7377	1.0885		bdl	2.01	0.043	0.47	4.4	0.308	24.3	10.52	152.2	52.3	176.083	76.7717	753.704	100.6
DC2	63	2.15	4359	43.2	0.00991053	0.04807	0.877881	0.00907	2.0077	58.21	1.16509	58.1398	1.16405		0.015	0.57	0.172	1.29	7.19	0.1	26.2	10.61	119.2	32.2	134.652	26.1182	321.58	45.5
DC2	64	2.062	306.1	31.6	0.103234	0.0664	2.76027	0.00886	2.24874	56.84	1.2655	55.4861	1.25084		bdl	0.9	0.019	0.23	1.71	0.116	12.12	5.62	79.7	29.7	105.304	44.3218	398.626	75.3
DC2	65	1.115	1702	33.4	0.019624	0.04767	1.34248	0.009	2.08273	57.73	1.18983	57.7216	1.19939		0.002	0.66	0.063	0.65	2.53	0.116	13.79	7.08	94.8	29.2	98.3992	37.9901	375.177	52.2
DC2	66	3.562	2430	126.5	0.0520576	0.04774	1.11339	0.009316	1.90313	59.77	1.13971	59.7366	1.13397		bdl	2.85	0.055	0.84	6.64	0.373	39	20.29	289	104.2	345.261	126.634	1025.04	151.2
DC2	67	13.24	5960	456	0.0765101	0.04827	0.875522	0.00907	2.1481	58.19	1.24066	58.1252	1.24506		0.028	4.1	0.346	2.57	15.3	0.58	75.9	35.5	479	148.9	559.322	178.079	1249.47	185.8
DC2	68	29.27	7249	1037	0.143054	0.0477	0.723571	0.00935	1.92454	60.01	1.15949	59.9569	1.15055		bdl	8.01	0.124	1.43	16.9	1.31	91.4	40.73	530	166.6	616.29	173.33	1353.32	181.1
DC2	69	10.32	1853	395.5	0.213438	0.04717	1.18067	0.008713	1.92335	55.92	1.07728	55.9215	1.07353		0.015	2.56	0.07	0.49	5.48	0.435	37	15.77	202.4	63.1	222.693	62.5254	566.115	86.1
DC2	70	1.44	6790	49.67	0.00731517	0.04778	0.694556	0.0096	1.96798	61.6	1.2147	61.5487	1.20794		0.017	0.93	0.05	0.29	3.01	0.128	21.5	13.66	208.5	65.5	210.609	51.445	395.276	66
DC2	71	35.39	8450	1219	0.14426	0.04791	0.736673	0.00952	1.9736	61.1	1.21413	61.0274	1.20107		bdl	9.8	0.139	1.98	21.8	1.5	105.8	48.62	623	203.4	740.584	211.32	1852.44	223.7
DC2	72	53.45	9330	1867	0.200107	0.04814	0.72038	0.00947	2.041	60.78	1.25925	60.6904	1.23514		0.003	10.46	0.135	2.33	25.9	1.95	119.8	49.9	607	188.4	702.605	175.704	1410.26	185.2
DC2	73	22.51	5015	762.4	0.152024	0.05055	0.963456	0.009398	1.85925	60.3	1.1206	60.0475	1.11354		0.025	6.01	0.083	1.81	16.7	0.93	81.6	37.2	489	163.4	576.585	151.961	1323.17	192.2
DC2	74	2.685	4960	69	0.0139113	0.04803	0.781187	0.00963	2.16183	61.76	1.33659	61.721	1.33067		bdl	1.2	0.016	0.54	5.35	0.204	34.2	19.5	277	95.6	431.576	125.051	1159.03	167
MR13-14	1	0.495	1396	12.25	0.00877507	0.04843	1.15094	0.008845	0.981094	56.77	0.42	56.6761	0.556682		0.18	0.31	bdl	0.37	0.93	0.033	4.16	5.28	56.2	23.2	119.9	37.9	438	81.7
MR13-14	2	10.13	11670	383.7	0.0328792	0.04764	0.713344	0.009122	0.932565	58.54	0.39	58.5038	0.544621		0.01	1.33	bdl	1.58	12.3	0.7	100.2	90.7	987	373	1815	512	5330	931
MR13-14	3	9.33	12230	352.6	0.0288307	0.04762	0.741582	0.00913	1.07349	58.59	0.5	58.5564	0.627287		bdl	1.37	bdl	1.38	16.2	0.55	101.3	93.4	981	361.1	1770	493	5240	913
MR13-14	4	22.15	20020	846	0.0422577	0.04732	0.68349	0.009206	1.12916	59.08	0.55	59.0647	0.665308		bdl	4.36	bdl	0.91	12.8	0.62	93.2	81.7	846	320.4	1571	429	4550	779
MR13-14	5	14.13	13500	541	0.0400741	0.04724	0.697873	0.009225	1.08377	59.19	0.51	59.1921	0.639985		bdl	1.81	0.003	1.91	18.8	1.01	133.2	119	1285	490.9	2392	650	6660	1164
MR13-14	6	1.84	4440	73	0.0164414	0.04759	0.785633	0.0089	1.05538	57.12	0.48	57.0879	0.601881		bdl	1.79	0.41	6.9	14	0.94	42	31	259	88	392	108	1160	198
MR13-14	7	10.19	10710	385.8	0.0360224	0.04734	0.723117	0.009255	0.997277	59.39	0.45	59.3766	0.590854		bdl	1.49	0.125	1.49	18.4	0.77	115.4	100.4	1154	441	2218	601	6190	1064
MR13-14	8	2.61	5780	101.1	0.0174913	0.04705	0.788488	0.008806	1.10784	56.52	0.5	56.5251	0.62577		bdl	1.13	0.117	0.87	4.7	0.41	24.2	21.5	219	93.6	540	187.1	2483	511
MR13-14	9	8.59	11020	339	0.0307623	0.04735	0.723088	0.009203	1.10291	59.05	0.52	59.0432	0.649684		bdl	1.56	0.002	1.72	14.5	0.73	108	98.1	1070	388	1903	529	5630	962
MR13-14	10	9.62	11170	382.8	0.0342704	0.0473	0.697756	0.009232	0.950307	59.24	0.41	59.2324	0.56169		bdl	1.75	0.037	1.99	16.6	0.82	118.8	108.5	1168	432.6	2178	572	6100	1058
MR13-14	11	0.429	2129	13.63	0.00640207	0.04756	0.849327	0.008498	0.909004	54.55	0.34	54.5188	0.498017		0.32	0.36	bdl	0.02	1.12	0.099	10.2	7.65	79.6	29.7	142.3	47.7	607	119.7
MR13-14	12	4.77	4320	155	0.0358796	0.04875	1.1458	0.008979	1.07606	57.62	0.5	57.509	0.618641		0.21	1.39	0.139	0.67	6.2	0.2	25.9	21.7	236	89	445	126	1320	235
MR13-14	13	0.657	2186	21.5	0.00983532	0.04789	0.932196	0.008221	1.02354	52.78	0.42	52.7247	0.543986		0.29	0.16	0.008	0.35	1.07	0.101	6.57	6.82	79.7	33.5	192.7	74	1083	228.5
MR13-14	14	1.88	4333	35.78	0.00825756	0.04856	0.829184	0.008937	0.89512	57.36	0.35	57.2545	0.512402		0.2	0.3	0.049	bdl	2.68	0.072	23.1	20.8	195.2	65.8	259.8	62.4	573	80.8
MR13-14	15	6.287	11800	237.1	0.0200932	0.04743	0.697504	0.009161	0.841779	58.79	0.31	58.7687	0.493887		0.05	2.45	0.05	0.94	8.7	0.35	55.5	52.2	560	216.8	1065	306.1	3466	593
MR13-14	16	8.634	10389	327.4	0.0315141	0.04723	0.690466	0.009148	0.946981	58.7	0.4	58.7003	0.554785		0.18	1.13	bdl	1.81	13.3	0.62	92.4	86.1	906	353.7	1720	470.4	5110	889
MR13-14	17	7.71	10610	294	0.0277097	0.04717	0.714555	0.009135	0.971854	58.62	0.42	58.6216	0.568612		bdl	1.24	0.19	1.29	12.1	0.53	93.8	84	911	344	1686	493	5290	904
MR13-14	18	8.6	10500	322.5	0.0307143	0.04728	0.732817	0.009131	0.939973	58.6	0.39	58.5879	0.54973		0.29	1.11	0.114	1.12	12.5	0.57	100.4	88.1	931	357.6	1730	482.2	5270	900
MR13-14	19	0.892	4260	25.5	0.00598592	0.04723	0.812187	0.008748	0.93668	56.15	0.38	56.1412	0.526388		0.13	0.54	0.024	0.67	1.81	0.088	10	8.3	94	44.3	303	110.9	1530	325
MR13-14	20	8.46	7150	189.9	0.0265594	0.04994	1.06292	0.0081	1.28727	52	0.58	51.8166	0.670916		bdl	1.03	0.1	1.48	8.4	0.57	57.7	49.3	518	194	941	267	3020	526
MR13-14	21	9.47	11450	366.1	0.0319738	0.04727	0.705786	0.009129	0.972207	58.58	0.42	58.5758	0.568373		bdl	1.4	0.061	1.7	15.4	0.81	110.7	98.3	1055	395	1946	531	5710	991
MR13-14	22	8.59	11260	328.5	0.0291741	0.04725	0.732916	0.009106	1.07528	58.43	0.5	58.4302	0.626994		bdl	1.3	0.01	1.18	14.2	0.66	109.2	100.2	1068	406	1949	557	5870	1018
MR13-14	23	3.49	6680	96	0.0143713	0.04778	0.751281	0.008889	1.04735	57.05	0.47	57.0039	0.596433		0.01	0.52	0.084	0.49	3.4	0.2	19.8	20.7	230	99	570	206	2770	556
MR13-14	24	1.587	2894	19.54	0.0067519	0.04892	0.893628	0.008903	0.928261	57.14	0.37	57.0114	0.529271		bdl	0.21	0.136	0.4	2.13	0.112	6.2	6.37	69	26.6	170.6	64.7	917	189.8
MR13-14	25	12.06	14950	402	0.0268896	0.04764	0.751837	0.009074	1.15835	58.23	0.55	58.1969	0.672708		bdl	3.35	0.18	2.6	17	0.53	79.9	72.9	712	263	1370	397	4330	746
MR13-14	26	9.38	10640	343.3	0.032265	0.0474	0.732422	0.009177	0.937517	58.89	0.39	58.8732	0.550902		bdl	1.29	0.089	1.07	12.6	0.72	87	81.7	885	345.9	1717	472	5080	870
MR13-14	27	8.749	11220	331.6	0.0295544	0.04716	0.706036	0.009117	0.932828	58.51	0.39	58.5072	0.544791		0	1.12	0.029	1.22	14.8	0.58	93.4	61.0877	923	344.2	1701	475	5130	884
MR13-14	28	1.104	3814	40.98	0.0107446	0.04746	0.823542	0.008728	1.00587	56.02	0.43	55.997	0.563624		bdl	0.17	bdl	0.24	2.27	0.135	10.9	7.24065	122.1	50.4	274	87.5	1038	209.6
MR13-14	29	19.87	20000	752	0.0376	0.047169	0.680488	0.009198	0.913209	59.02	0.38	59.0247	0.537921		0.24	3.65	0.045	1.08	15	0.65	98	55.0955	843	304.7	1464	403.1	4180	711
MR13-14	30	8.56	6100	308	0.0504918	0.0476	0.78558	0.009306	0.994137	59.71	0.45	59.6832	0.592128		0.09	2.15	0.036	1.77	13.6	1.07	111.3	56.0942	1033	422	1897	448	4180	667
MR13-14	31	8.61	8230	313.8	0.0381288	0.0474	0.732422	0.009358	1.0319	60.04	0.48	60.0307	0.618066		0.09	4.03	bdl	0.89	9.33	0.7	66	40.8639	680	271.4	1288	309	2856	455
MR13-14	32	1.68	4867	45.22	0.00929114	0.04764	0.809681	0.009078	0.967047	58.26	0.41	58.2225	0.562228		bdl	0.34	0.064	0.2	2.74	0.138	14	9.82065	145.8	47.8	234.6	75	961	168.4
MR13-14	33	24.37	21970	931	0.042376	0.04734	0.683463	0.009198	1.1121	59.02	0.53	59.012	0.654695		0.26	4.07	0.158	1.43	17.7	0.49	99	52.0994	884	302.5	1448	396	4070	685
MR13-14	34	0.736	3346	23.2	0.00693365	0.04745	0.836715	0.009094	1.08496	58.36	0.51	58.3387	0.631818		bdl	0.19	0.17	bdl	1.27	0.032	10.6	5.82581	92.6	34	173.2	57.8	729	136
MR13-14	35	9.15	11850	325.6	0.0274768	0.04756	0.722476	0.009094	0.990769	58.36	0.43	58.3307	0.576866		0.05	2.23	0.062	1.36	8.6	0.44	66.6	43.6103	615	243.4	1202	346	3800	659
MR13-20	1	1.6	1693	25.79	0.0152333	0.04917	0.819599	0.012111	1.71866	77.6	1.33115	77.4466	1.32972		bdl	0.56	bdl	bdl	2.7	0.028	14.7	8.54	116.9	38.7	175	70.5	407	64.4
MR13-20	2	6.52	5115	159.5	0.0311828	0.04802	0.60586	0.012222	1.74137	78.31	1.36044	78.2667	1.36167		bdl	1.47	bdl	0.35	6.4	0.115	32.5	20.27	295	103	496	197.4	1139	183.5
MR13-20	3	7.2	1126	17.62	0.0156483	0.0666	4.07786	0.011959	1.79385	76.64	1.37407	74.7997	1.36441		bdl	0.35	bdl	bdl	1.32	0.041	7.52	4.9	78.3	26.9	129.6	48.5	274	42.4
MR13-20	4	2.69	3526	65.43	0.0185564	0.04765	0.734095	0.011673	1.69696	74.81	1.26851	74.7995	1.26645		bdl	1.11	bdl	0.28	4	0.092	20.6	15.05	216.5	77.9	365	139.7	816	133.3
MR13-20	5	1.204	1656	29.23	0.017651	0.04783	0.889952	0.011619	1.75222	74.47	1.30408	74.438	1.30132		0.016	0.55	bdl	0.11	2.1	0.058	12.2	8.15	113.7	39.3	171	65.9	361	52.8
MR13-20	6	13.1	3530	56.4	0.0159773	0.058	2.11523	0.012244	1.71915	78.45	1.34745	77.4231	1.33519		0.012	0.74	bdl	0.32	4.97	0.033	24.1	13.64	187	65.1	304	129	780	120
MR13-20	7	10.02	7867	168.3	0.0213932	0.04944	1.06592	0.011416	1.71347	73.17	1.25423	72.9944	1.24775		0.008	2.22	0.03	0.32	9.2	0.215	65.8	39.8	565	180.2	799	290.3	1548	219.4
MR13-20	8	3.59	4170	41.7	0.01	0.04872	1.07901	0.012246	1.75733	78.46	1.37871	78.3507	1.37635		bdl	0.78	bdl	1.31	5.7	0.041	22.4	10.6	120	37.4	166	69.6	427	72.7
MR13-20	9	1.5	4022	35.73	0.00888364	0.04743	0.70292	0.011614	1.74886	74.44	1.30364	74.4435	1.29867		0.01	0.73	bdl	bdl	3.4	0.011	14.5	10.1	146.4	50.3	214.5	76.9	412	54.1
MR13-20	10	1.097	664	24.58	0.0370181	0.0492	1.43111	0.011639	1.77706	74.6	1.32272	74.4372	1.32081		bdl	0.68	bdl	bdl	1.66	0.09	10.2	6.59	93.9	33.2	144.4	54.7	313.4	49.6
MR13-20	11	2.02	1469	26.59	0.0181007	0.05	1.14769	0.011439	1.76413	73.32	1.29144	73.0893	1.28644		bdl	0.58	bdl	bdl	1.44	0.033	13.8	10.48	147.9	52.5	240.9	90.6	503	77.9
MR13-20	12	1.28	2878	21.5	0.00747047	0.04838	0.882319	0.011372	1.76972	72.89	1.28942	72.8112	1.28498		0.009	0.67	0.03	0.07	2.58	0.017	9.7	7.44	102	35.2	162	67.7	430	67.2
MR13-20	13	0.664	474	10.67	0.0225105	0.0502	2.04005	0.01123	1.8311	72.02	1.323	71.7408	1.3124		bdl	1.94	bdl	5.4	13	0.285	31.5	12.1	134.1	42.6	180	56.9752	416	66.8
MR13-20	14	7.86	928.5	33.72	0.0363166	0.0711	4.52216	0.0122	1.92235	78.15	1.50635	75.859	1.48989		0.014	0.5	bdl	bdl	1.13	0.041	6.05	3.42	51.6	17.91	81.2	29.1408	191	30.2
MR13-20	15	9.8	791	21.79	0.0275474	0.0863	8.4703	0.01226	2.11724	78.6	1.6708	74.7297	1.73669		0.01	0.79	bdl	bdl	1.98	0.122	15.1	8.96	130.5	46	213.8	64.0092	451	74.2
MR13-20	16	17.9	1216	30.18	0.0248191	0.0893	4.38941	0.01301	1.97213	83.34	1.64306	78.9681	1.61208		0.002	0.53	bdl	0.24	1.59	0.058	7.5	5.48	83.3	30.9	142.2	39.3903	310	52
MR13-20	17	10.22	6776	217.2	0.0320543	0.0487	0.757018	0.011588	1.78615	74.27	1.32673	74.159	1.32125		0.009	0.54	0.35	bdl	1.66	bdl	10.1	7.05	93.9	35	161.3	48.3335	344	53.6
MR13-20	18	2.12	2143	44.58	0.0208026	0.04827	0.919995	0.011446	1.81882	73.37	1.33229	73.2934	1.32953		bdl	1.61	bdl	1.23	7.3	0.18	46	27.5	366	119.2	496	149.623	939	129.2
MR13-20	19	2.41	537.7	9.05	0.0168309	0.0605	3.82703	0.01175	1.81227	75.32	1.37885	74.0749	1.35681		bdl	0.8	0.27	0.72	2.52	0.09	15.8	10.38	146.8	51.5	225.7	60.2913	446	65.8
MR13-20	20	4.8	1803	51.39	0.0285025	0.053	2.1216	0.01121	1.74833	71.86	1.25779	71.3606	1.24743		bdl	0.22	0.15	0.07	bdl	0.017	3.85	2.13	32.9	12.33	57.1	16.3791	128.2	19.75
MR13-20	21	14.8	1214	25.83	0.0212768	0.0811	9.2583	0.01319	2.05454	84.5	1.74296	80.9268	1.84607		0.012	0.61	bdl	0.2	2.64	0.098	14.9	9.61	137.6	46.1	191	56.6738	365	54
MR13-20	22	2.679	2956	65.3	0.0220907	0.0476	0.751517	0.01241	1.79146	79.5	1.42846	79.5076	1.42387		bdl	0.42	0.02	bdl	1.8	0.107	9.6	5.72	81.6	27.5	120.7	37.883	248	40.1
MR13-20	23	39.8	2713	42.28	0.0155842	0.0894	3.27355	0.01279	1.9386	81.91	1.58983	77.6279	1.53524		0.012	1	0.13	0.16	2.7	0.001	16.8	12.03	182.1	64.3	312	97.6718	775	127.2
MR13-20	24	3.96	1469	34.49	0.0234786	0.0535	2.28574	0.01198	1.84475	76.79	1.41903	76.1945	1.4077		bdl	0.54	0.15	0.07	2.5	0.13	16.1	10.61	147.1	51.8	255.1	79.5845	611	101.4
MR13-20	25	3.481	4690	95.4	0.0203412	0.04773	0.652538	0.011519	1.80404	73.83	1.32948	73.8091	1.32787		0	0.71	0.03	0.32	2.5	0.096	16	10.3	150.7	53.7	219.8	57.4777	437	64.9
MR13-20	26	5.36	2799	73.8	0.0263666	0.05037	1.62894	0.01259	1.82301	80.66	1.45875	80.3752	1.46741		0.002	1.59	0.03	0.12	4.38	0.161	34.1	22.03	317.2	99.2	405	114.252	701	101
MR13-20	27	6.13	1982	27.35	0.0137992	0.0573	2.48258	0.01127	1.80847	72.24	1.30693	71.3507	1.29241		0.007	0.78	0.12	0.4	3.21	0.007	19.5	12.9	170	56.9	241	67.3252	465	67.8
MR13-20	28	7.8	1342	26.2	0.0195231	0.0654	5.36974	0.012106	1.79687	77.57	1.39186	75.8325	1.40289		0	0.46	0.07	0.16	1.22	0.045	11.6	8.24	128.1	39.4	154.8	35.8733	256.6	33.36
MR13-20	29	10	5970	245.7	0.0411558	0.04777	0.593124	0.01257	1.86316	80.54	1.49606	80.5111	1.49983		n/a	n/a	n/a	n/a	n/a	n/a	n/a	n/a	n/a	n/a	n/a	n/a	n/a	n/a
MR13-20	30	10.6	5320	206	0.0387218	0.04936	0.869191	0.01242	1.82877	79.56	1.4432	79.3954	1.45155		n/a	n/a	n/a	n/a	n/a	n/a	n/a	n/a	n/a	n/a	n/a	n/a	n/a	n/a
MR13-20	31	4.72	971	34.06	0.0350772	0.059	3.75468	0.01211	1.80052	77.6	1.39684	76.4816	1.39175		n/a	n/a	n/a	n/a	n/a	n/a	n/a	n/a	n/a	n/a	n/a	n/a	n/a	n/a
MR13-20	32	14.9	1537	31.79	0.0206831	0.0748	4.5667	0.01281	1.81587	82.03	1.497	79.2546	1.48282		n/a	n/a	n/a	n/a	n/a	n/a	n/a	n/a	n/a	n/a	n/a	n/a	n/a	n/a
MR13-20	33	5.07	1046	12.7	0.0121415	0.062	4.37701	0.01153	1.95736	73.9	1.43891	72.5539	1.43801		n/a	n/a	n/a	n/a	n/a	n/a	n/a	n/a	n/a	n/a	n/a	n/a	n/a	n/a
MR13-20	34	2.35	1321.7	34.43	0.0260498	0.05074	1.44805	0.011545	1.76858	74	1.30975	73.6951	1.30132		n/a	n/a	n/a	n/a	n/a	n/a	n/a	n/a	n/a	n/a	n/a	n/a	n/a	n/a
MR13-20	35	17.9	5217	151.3	0.0290013	0.0552	2.04075	0.01258	1.86277	80.56	1.48132	79.8225	1.49087		n/a	n/a	n/a	n/a	n/a	n/a	n/a	n/a	n/a	n/a	n/a	n/a	n/a	n/a
MR13-20	36	0.962	773	21.79	0.0281889	0.04878	1.22944	0.01183	1.80957	75.83	1.37643	75.6939	1.36771		n/a	n/a	n/a	n/a	n/a	n/a	n/a	n/a	n/a	n/a	n/a	n/a	n/a	n/a
MR13-20	37	4.21	2240	50.7	0.0226339	0.05156	1.31695	0.011769	1.75546	75.43	1.32218	75.0417	1.31568		n/a	n/a	n/a	n/a	n/a	n/a	n/a	n/a	n/a	n/a	n/a	n/a	n/a	n/a
MR13-20	38	4.14	2606	74.8	0.028703	0.04975	1.32162	0.011877	1.76323	76.11	1.34035	75.9007	1.33687		n/a	n/a	n/a	n/a	n/a	n/a	n/a	n/a	n/a	n/a	n/a	n/a	n/a	n/a
MR13-20	39	1.48	719	16.2	0.0225313	0.0526	2.13704	0.01218	1.79835	78.06	1.40798	77.5497	1.39704		n/a	n/a	n/a	n/a	n/a	n/a	n/a	n/a	n/a	n/a	n/a	n/a	n/a	n/a
MR13-20	40	1.99	1951	36.8	0.0188621	0.04879	0.985058	0.011954	1.7978	76.61	1.37364	76.4832	1.37302		n/a	n/a	n/a	n/a	n/a	n/a	n/a	n/a	n/a	n/a	n/a	n/a	n/a	n/a
MR13-20	41	9.7	5680	214	0.0376761	0.04992	0.712886	0.01206	2.13238	77.3	1.6552	77.0489	1.63975		n/a	n/a	n/a	n/a	n/a	n/a	n/a	n/a	n/a	n/a	n/a	n/a	n/a	n/a
MR13-27	1	1.755	2335	39	0.0167024	0.04821	0.76484	0.012864	1.56857	82.4	1.2912	82.3406	1.28715		0.15	0.58	0.02	0.43	3.2	0.031	11.9	6.74	93.9	32.6	139.6	31.8	305	46.7
MR13-27	2	17.64	316.9	129.8	0.409593	0.05236	1.13502	0.04226	1.6639	266.8	4.38654	266.568	4.46789		0.13	8.65	0.4	1.11	8.7	0.72	18.4	6.9	88.8	33	155.4	35.2	343	57.9
MR13-27	3	10.55	95.8	60.7	0.633612	0.05249	1.55228	0.04272	1.63406	269.6	4.41997	269.387	4.44483		0	11	0.24	1.2	4.1	0.91	7.7	2.27	22.4	8.3	40.5	9.5	96	18.7
MR13-27	4	3.88	3220	68	0.021118	0.04933	0.717109	0.01277	1.64378	81.78	1.33677	81.6265	1.3369		bdl	0.41	0.47	1.11	5.5	0.038	17.5	9.02	125	41.3	167	35.9	330	49.5
MR13-27	5	20.54	396	87.8	0.221717	0.05772	0.643848	0.07954	1.55593	493.3	7.61154	492.976	7.49688		bdl	11.66	0.13	0.48	3.06	0.299	8	3.31	49.9	20.62	108.6	26.9	309	54.7
MR13-27	6	9.7	3386	85.9	0.0253692	0.0541	2.06848	0.0124	1.61566	79.47	1.28352	78.7954	1.27259		bdl	1.48	1.01	3.22	25.9	0.098	48.2	16.6	178.6	50.6	193.7	40.6	362	52.7
MR13-27	7	10.63	471.4	129.5	0.274714	0.04934	1.10128	0.01856	1.73435	118.5	2.04751	118.408	2.056		bdl	24.6	0.06	0.19	4.2	0.292	10	4.58	65.3	27.3	143.4	36.2	380	66.9
MR13-27	8	22.5	19070	494	0.0259046	0.04862	0.575288	0.013074	1.51884	83.74	1.27064	83.6358	1.26619		bdl	11.14	0.51	3.44	18.5	1.13	31.1	11.15	133.9	49.6	224.8	47.8	449	76.3
MR13-27	9	6.6	314.3	49.3	0.156857	0.05246	0.955657	0.04034	1.54124	254.9	3.91087	254.579	3.87941		bdl	4.94	bdl	0.27	0.67	0.088	1.58	0.9	10.8	5.34	29.1	7.64	92.2	20.02
MR13-27	10	35.23	496.5	283.6	0.571198	0.0576	1.94716	0.03623	1.61267	229.4	3.68163	227.477	3.64473		bdl	34.7	0.28	1.25	6.7	0.52	14.8	6.36	87.6	37.6	206.3	53.9	561	103.5
MR13-27	11	7.85	1556	11.86	0.00762211	0.0641	2.52486	0.011223	1.58751	71.94	1.14279	70.4393	1.12392		bdl	0.47	0.14	0.25	1.45	0.01	4.31	3.72	62.8	24.35	120	31.5	318	58.5
MR13-27	12	14.86	162.5	124.5	0.766154	0.05614	1.54376	0.03856	1.60165	243.9	3.85999	242.374	3.84379		0.02	30.2	0.29	2.18	10.5	1.32	17.2	5.51	61.1	22.31	99.9	23.59	245.9	40.5
MR13-27	13	4.07	3786	90.2	0.0238246	0.04857	0.79651	0.01264	1.69154	80.98	1.37048	80.8763	1.36301		bdl	1.15	0.99	2.46	24.8	0.092	44.2	17.1	174	48.1	160	32.9	297	41.5
MR13-27	14	5.71	4580	97.1	0.0212009	0.04929	0.717528	0.0131	1.63251	83.9	1.37771	83.7308	1.36261		bdl	0.75	0.06	0.37	12.5	0.045	44.6	14.9	104.3	22.39	74.5	14.09	105.7	14.09
MR13-27	15	11.3	2225	24.16	0.0108584	0.0627	3.37077	0.01228	1.61961	78.67	1.26883	77.1863	1.26217		0.11	0.43	0.08	0.22	2.83	0.047	9.1	6.33	73.8	21.39	72.5	13.53	113.5	14.33
MR13-27	16	19.64	133.1	169.9	1.27648	0.05195	1.54878	0.03991	1.58904	252.2	4.00956	252.058	3.96396		bdl	16.69	0.79	3.1	12.1	1.69	20.8	6.38	76.8	27.37	131.6	29.62	315.8	58.3
MR13-27	17	18.99	220.2	138.5	0.628974	0.0617	2.14096	0.04101	1.56846	259.1	4.04945	255.801	3.9871		bdl	16.41	0.18	1.31	9.1	0.5	15.8	7.02	87.4	36.9	181.5	42	422	76.8
MR13-27	18	42.9	294	184.4	0.627211	0.05937	0.985739	0.07919	1.54103	491.3	7.50397	489.88	7.38256		0	11.51	0.19	1.07	5.7	0.76	9.8	4.19	54	22.15	115.5	30.3	355.3	73.7
MR13-27	19	19.4	5600	340	0.0607143	0.0546	4.412	0.01019	5.2916	65.3	3.42429	64.7576	3.42299		bdl	4.6	4.5	23.3	169	0.73	244	73	600	138	460	78	650	82
MR13-27	20	7.24	103.2	55.1	0.533915	0.0603	2.68047	0.03983	1.70844	251.8	4.26463	248.954	4.28717		bdl	15.2	0.69	1.13	4.5	0.345	7.3	2.57	33.6	12.61	59.8	15.51	174.6	31.8
MR13-27	21	13.97	238.7	158	0.661919	0.04982	1.28202	0.02917	1.62387	185.3	2.99664	185.345	2.98487		bdl	11.55	0.58	2.15	14.5	1.07	25.8	10.16	133.1	51.9	240.3	53.3	541	93.5
MR13-27	22	6.04	2438	27.14	0.0111321	0.05429	1.62903	0.012451	1.56829	79.77	1.24932	79.0991	1.23843		bdl	22.7	1.59	3.87	8.9	0.5	15.8	5.88	76.1	30.1	139.7	32.6	337	59.1
MR13-27	23	23.7	425	178	0.418824	0.05869	1.62952	0.04038	1.6337	255.2	4.14426	252.868	4.09186		bdl	3.3	0.12	0.46	2.08	0.139	10	6.36	83.6	31.6	138.3	32.2	355	57.2
MR13-27	24	5.46	66.2	45.7	0.690332	0.0543	2.06112	0.03898	1.72076	246.5	4.2035	245.542	4.18581		bdl	2.03	0.72	1.09	4.5	0.107	9	3.85	40.1	13.15	62.4	17.19	230	46.7
MR13-27	25	64.1	13540	1214	0.0896603	0.0558	2.89245	0.01178	2.75857	75.5	2.0874	74.7099	2.05799		0.22	2.51	0.11	0.1	1.23	0.256	2.1	0.97	11.5	4.73	24.86	6.82	73.1	13.32
MR13-27	26	43	462	319	0.690476	0.05397	0.916306	0.04512	1.56939	284.5	4.45694	283.795	4.39157		0	0.23	0.08	0.18	1.91	0.024	10.6	6.76	93	26.94	105.9	22.89	190.6	27.3
MR13-27	27	14.17	711.4	43.42	0.0610346	0.06241	0.731368	0.09016	1.57983	556.5	8.71262	554.007	8.60209		bdl	16.7	0.02	0.63	4.12	0.47	10.9	4.19	65.2	27.6	152	41.3	448	90.7
a conentration data are normalized to the primary reference material and are accurate to ~ 10%
b Rho value is calculated following the method outlined in Paton et al., (2010)
c Age calculations are based on the decay constants of Jaffey et al. (1971)
d 207Pb-corrected age based on single stage model common lead composition (Stacey & Kramers, 1975) at the inferred crystallization age
e incorporates uncertainties on the measured 206Pb/238U and 207Pb/206Pb ratios as well as a 2% uncertainty on the assumed common lead composition
f texcess = (1/ λ238) ln[1 + (f – 1)( λ238/ λ230)]
* high common Pb, rejected

## Sheet: S4 Zircon Hf isotopes
S4: Zircon Hf isotope data
Sample	Spot	Hf beam (V)	βHf	βYb	176Hf/177Hf	±2σ	176Lu/177Hf	±2σ	176Yb/177Hf	analysis age	176Hf/177Hfi	εHfi	±2σ
DC2	1	5.4	-1.435	-1.931	0.283021	4.9e-05	0.001514	1.5e-05	0.0335481	63.23	0.281505	10.1293	3.46617
DC2	2	6.02	-1.4311	-1.925	0.282836	4.8e-05	0.000653	9.6e-05	0.0160048	62.8	0.282182	3.61267	3.39544
DC2	3	5.22	-1.4284	-1.924	0.282847	6e-05	0.002403	3.1e-05	0.0588428	60.59	0.280441	3.88422	4.24427
DC2	4	6.5	-1.4393	-1.937	0.282831	8.1e-05	0.00276	0.0003	0.0571438	60.83	0.280068	3.30887	5.72981
DC2	5	5.12	-1.4311	-1.916	0.283034	5.3e-05	0.001571	1.3e-05	0.0344912	59.72	0.281461	10.5133	3.74909
DC2	6	5.41	-1.4398	-1.914	0.282923	5.3e-05	0.00314	0.00025	0.0733585	60.6	0.279779	6.54298	3.74915
MR13-20	1	7.33	-1.427	-1.9	0.28284	8.3e-05	0.00132	0.00017	0.0329823	78.31	0.281518	4.05322	5.87149
MR13-20	2	7.15	-1.4389	-1.919	0.282825	5.9e-05	0.00122	0.00012	0.0326057	74.81	0.281603	3.45387	4.17367
MR13-20	3	6.63	-1.4382	-1.909	0.282838	4.1e-05	0.00063	2.1e-05	0.0164513	74.47	0.282207	3.9355	2.90034
MR13-20	4	7.4	-1.4419	-1.881	0.282884	4.8e-05	0.000595	2.4e-05	0.0146954	74.44	0.282288	5.56359	3.39552
MR13-20	5	6.37	-1.4428	-1.945	0.282808	5.4e-05	0.00074	1.2e-05	0.0181792	73.32	0.282067	2.84433	3.81995
MR13-20	6	7.5	-1.4342	-1.934	0.282813	3.9e-05	0.000732	3.7e-05	0.0174871	72.89	0.28208	3.01234	2.75885
MR13-20	7	6.57	-1.4321	-1.9	0.282842	3.7e-05	0.000355	2.4e-05	0.00807001	72.02	0.282487	4.03732	2.61736
MR13-20	8	6.46	-1.4357	-1.932	0.282801	3.3e-05	0.000513	3e-05	0.0122072	73.37	0.282287	2.60881	2.33441
MR13-14	1	6.49	-1.3931	-1.9159	0.282739	6e-05	0.00947	0.00018	0.20537	58.59	0.273259	-0.249561	4.24427
MR13-14	2	6.95	-1.395	-1.9191	0.282752	6.2e-05	0.009107	5e-05	0.205814	59.08	0.273635	0.232065	4.38573
MR13-14	3	6.48	-1.3912	-1.911	0.282787	8.7e-05	0.00683	0.00037	0.134018	58.62	0.27595	1.55075	6.15422
MR13-14	4	6.43	-1.3997	-1.9208	0.282839	7.1e-05	0.0111	0.00022	0.245096	58.6	0.271727	3.22443	5.02239
MR13-14	5	6.64	-1.3877	-1.9135	0.282765	6.4e-05	0.01069	0.00035	0.237067	58.58	0.272063	0.622702	4.52728
MR13-14	6	6.97	-1.3945	-1.9089	0.282823	7.6e-05	0.012	0.00013	0.266218	58.43	0.27081	2.62134	5.37605
MR13-14	7	7.27	-1.3988	-1.913	0.282805	7.6e-05	0.00646	0.00044	0.13337	57.05	0.276338	2.17397	5.37613
MR13-14	8	7.94	-1.4003	-1.9119	0.282736	5.3e-05	0.00802	0.00016	0.183362	59.02	0.274707	-0.292448	3.74911
MR13-27	1	5.682	-1.3987	-1.985	0.282495	4.2e-05	0.001075	3.4e-05	0.0234981	266.8	0.281415	-4.13131	2.97236
MR13-27	2	6.03	-1.3978	-1.978	0.282569	4.8e-05	0.00085	4e-05	0.0175024	269.6	0.281715	-1.41304	3.397
MR13-27	3	11.4	-1.4166	-1.903	0.28297	3.7e-05	0.000603	3e-05	0.0152486	81.78	0.282366	8.76322	2.61742
MR13-27	4	6.83	-1.3942	-1.951	0.282436	4.4e-05	0.001133	8.6e-05	0.0226038	493.3	0.281293	-1.40268	3.11594
MR13-27	5	6.41	-1.4005	-1.916	0.281986	3.4e-05	0.001008	5.3e-05	0.0215731	254.9	0.280973	-22.3839	2.40618
MR13-27	6	5.76	-1.4029	-1.97	0.282649	5e-05	0.000928	6.9e-05	0.0173166	491.3	0.281712	6.16211	3.54053
MR13-27	7	7.02	-1.403	-1.938	0.282645	5.1e-05	0.000601	1.2e-05	0.0116914	251.8	0.282041	0.935801	3.60914
MR13-27	8	6.4	-1.3789	-1.9	0.28265	6.5e-05	0.001221	5.3e-05	0.0227916	459	0.281419	5.41358	4.6021
